# Supplementary material
Source: publisher figshare collection journal article supplement (https://iop.figshare.com/ndownloader/files/22461434)
Supplement: Supplementary file 1 [file 22461434]

## Sheet: Metadata_including_outliers
StudyID	DataID	ObsID	Author	Sample data (Location_Year)	Title	Publication year	Study year	Journal	Country	Contingent	Published in peer-reviewed journal	CE	CE_Mixed logit	CV_Non-parametric	OE	Other	CV-Payment Card	North-America	GDP (GDP per capita in current (2017) US$ PPP in the data collection year)	ln_GDP	Mean WTP (as in original study)	Conversion factor from local currency to PPP US$ (year of study) (only if original estimate not in US$)	Conversion factor from year of study to current (2017) US$ PPP	Mean WTP	Ln_WTP	Species abundance	Species richness	Sample size / 1000	Rel_weights	WTP Measure is a gain (Compensating Surplus)	Payment interval (annual)	Unit (per household)	Habitat focused	Marine	Wetland	Grassland_Shrubland	Forest	Mammals	Birds	Species focused	Single species	Multiple species	Interviewer (face-to-face or telephone)	Face-to-face	Payment vehicle (voluntary)	Is the outcome uncertain?	Non-use value isolated by excluding users based on past or intended recreational use?	Non-use value isolated by allocation of TEV/NUV to existence and bequest value components?	Protest responses are removed
1	1	1	Bateman	Bateman	‘Non-user’s WTP for a National Park: An Application and Critique of the Contingent Valuation Method’	1997	16	Regional Studies 31, 571–582	United Kingdom	Europe	1	0	0	1	1	0	0	0	20423.5	9.92444	12.29	1.41029	1.45389	25.1995	3.22682	0	0	0.11	110	0	1	0	1	0	1	0	0	0	0	0	0	0	0	0	0	0	1	0	0
2	2	2	Shechter	Shechter	Measuring passive use value: Pledges, donations and CV responses in connection with an important natural resource	1998	14	Environmental and Resource Economics	Israel	Asia	1	0	0	1	1	0	0	0	17431.2	9.76602	29.7	0.29882	1.43828	12.7646	2.54668	0	0	0.232	232	0	0	1	1	0	0	0	1	0	0	0	0	0	1	1	1	0	1	0	0
3	3	3	Willis_1998	Willis_1998	Biodiversity values for alternative management regimes in remote UK coniferous forests: an iterative bidding polychotomous choice approach	1998	16	Environmentalist	United Kingdom	Europe	1	0	0	1	0	0	0	0	20423.5	9.92444	27.04	1.38636	1.43828	53.9169	3.98744	0	0	0.357	357	1	1	1	1	0	0	0	1	0	0	0	0	0	1	1	0	0	0	0	1
4	4	4	Broberg	Broberg	Assessing the non-timber value of old-growth forests in Sweden	2007	26	Umeå Economic Studies 712	Sweden	Europe	0	0	0	0	0	1	1	0	33967.2	10.4332	465	0.112574	1.16524	60.9968	4.11082	0	0	0.397	397	0	1	0	1	0	0	0	1	0	0	0	0	0	0	0	0	0	1	0	1
5	5	5	Borzykowski	Borzykowski	Scope Effects in Contingent Valuation: Does the Assumed Statistical Distribution of WTP Matter?	2018	38	Ecological Economics	Switzerland	Europe	1	0	0	0	1	0	0	0	64712.1	11.0777	188.42	0.819534	1	154.417	5.03965	0	0	0.12	120	1	0	0	1	0	0	0	1	0	0	0	0	0	0	0	0	0	0	0	1
5	5	6	Borzykowski	Borzykowski	Scope Effects in Contingent Valuation: Does the Assumed Statistical Distribution of WTP Matter?	2018	38	Ecological Economics	Switzerland	Europe	1	0	0	1	1	0	0	0	64712.1	11.0777	243.96	0.819534	2	399.867	5.99113	0	0	0.152	152	1	0	0	1	0	0	0	1	0	0	0	0	0	0	0	0	0	0	0	1
5	5	7	Borzykowski	Borzykowski	Scope Effects in Contingent Valuation: Does the Assumed Statistical Distribution of WTP Matter?	2018	38	Ecological Economics	Switzerland	Europe	1	0	0	1	1	0	0	0	64712.1	11.0777	341.52	0.819534	1	279.887	5.63439	0	0	0.183	183	1	0	0	1	0	0	0	1	0	0	0	0	0	0	0	0	0	0	0	1
5	5	8	Borzykowski	Borzykowski	Scope Effects in Contingent Valuation: Does the Assumed Statistical Distribution of WTP Matter?	2018	38	Ecological Economics	Switzerland	Europe	1	0	0	0	1	0	0	0	64712.1	11.0777	183.11	0.819534	1	150.065	5.01107	0	0	0.152	152	1	0	0	1	0	0	0	1	0	0	0	0	0	0	0	0	0	0	0	1
5	5	9	Borzykowski	Borzykowski	Scope Effects in Contingent Valuation: Does the Assumed Statistical Distribution of WTP Matter?	2018	38	Ecological Economics	Switzerland	Europe	1	0	0	0	1	0	0	0	64712.1	11.0777	276.69	0.819534	1	226.757	5.42388	0	0	0.183	183	1	0	0	1	0	0	0	1	0	0	0	0	0	0	0	0	0	0	0	1
5	5	10	Borzykowski	Borzykowski	Scope Effects in Contingent Valuation: Does the Assumed Statistical Distribution of WTP Matter?	2018	38	Ecological Economics	Switzerland	Europe	1	0	0	0	1	0	0	0	64712.1	11.0777	303.02	0.819534	1	248.335	5.51478	0	0	0.183	183	1	0	0	1	0	0	0	1	0	0	0	0	0	0	0	0	0	0	0	1
5	5	11	Borzykowski	Borzykowski	Scope Effects in Contingent Valuation: Does the Assumed Statistical Distribution of WTP Matter?	2018	38	Ecological Economics	Switzerland	Europe	1	0	0	1	1	0	0	0	64712.1	11.0777	97.36	0.819534	1	79.7898	4.3794	0	0	0.119	119	1	0	0	1	0	0	0	1	0	0	0	0	0	0	0	0	0	0	0	1
5	5	12	Borzykowski	Borzykowski	Scope Effects in Contingent Valuation: Does the Assumed Statistical Distribution of WTP Matter?	2018	38	Ecological Economics	Switzerland	Europe	1	0	0	1	1	0	0	0	64712.1	11.0777	126.84	0.819534	1	103.95	4.64391	0	0	0.182	182	1	0	0	1	0	0	0	1	0	0	0	0	0	0	0	0	0	0	0	1
6	6	13	Willis_1995	Willis_1995	Wildlife Enhancement Scheme	1995	15	England	United Kingdom	Europe	0	0	0	1	1	0	0	0	19575.8	9.88205	54.94	1.40044	1.50577	115.854	4.75233	0	0	0.177	177	0	1	1	1	0	1	0	0	0	0	0	0	0	1	1	1	0	1	0	1
7	7	14	Brouwer	Brouwer	Public willingness to pay for alternative management regimes of remote marine protected areas in the North Sea	2016	27	Marine Policy	Netherlands	Europe	1	0	0	1	0	0	0	0	40602.7	10.6116	87.5	1.22493	1.01799	109.11	4.69236	0	0	0.34	340	0	1	1	1	1	0	0	0	0	0	0	0	0	0	0	0	0	0	0	1
7	7	15	Brouwer	Brouwer	Public willingness to pay for alternative management regimes of remote marine protected areas in the North Sea	2016	27	Marine Policy	Netherlands	Europe	1	0	0	1	1	0	0	0	40602.7	10.6116	56.5	1.22493	1.01799	70.454	4.25496	0	0	0.398	398	0	1	1	1	1	0	0	0	0	0	0	0	0	0	0	0	0	0	0	1
8	8	16	Veisten_2004	Veisten_2004	Scope insensitivity in contingent valuation of complex environmental amenities	2004	23	Journal of Environmental Management	Norway	Europe	1	0	0	1	1	0	0	0	37959.8	10.5443	40.62		1.27267	51.696	3.94538	1	0	0.108	108	0	1	1	0	0	0	0	0	0	1	1	1	0	1	1	0	0	0	0	1
8	8	17	Veisten_2004	Veisten_2004	Scope insensitivity in contingent valuation of complex environmental amenities	2004	23	Journal of Environmental Management	Norway	Europe	1	0	0	1	1	0	0	0	37959.8	10.5443	55.38		1.27267	70.4807	4.25534	1	0	0.108	108	0	1	1	0	0	0	0	0	0	1	1	0	1	1	1	0	0	0	0	1
9	9	18	Whitehead_1991	Whitehead_1991	A link between behavior, information, and existence value	1991	10	Leisure Sciences	United States	North-America	1	0	0	0	0	0	0	1	23100	10.0476	17.48		1.64387	28.7349	3.35811	0	0	0.118	118	0	1	1	1	0	1	0	0	0	0	0	0	0	0	0	1	0	0	0	0
10	10	19	Carson_1991	Carson_19911993	Contingent Valuation and Lost Passive Use: Damages from the Exxon Valdez Oil Spill	2003	12	Environmental and Resource Economics	United States	North-America	1	0	0	0	0	0	0	1	24405.2	10.1026	79.2		1.30767	103.567	4.64022	1	0	1.203	1203	0	0	1	0	0	0	0	0	0	1	1	0	1	1	1	0	1	0	0	0
10	10	20	Carson_1991	Carson_19911993	Contingent Valuation and Lost Passive Use: Damages from the Exxon Valdez Oil Spill	2003	12	Environmental and Resource Economics	United States	North-America	1	0	0	1	0	0	0	1	24405.2	10.1026	53.6		1.30767	70.0911	4.2498	1	0	1.203	1203	0	0	1	0	0	0	0	0	0	1	1	0	1	1	1	0	1	0	0	0
11	10	21	Carson_1993	Carson_19911993	Temporal Reliability of Estimates from Contingent Valuation	1997	12	Land Economics	United States	North-America	1	0	0	1	0	0	0	1	24405.2	10.1026	52.8		1.45389	76.7652	4.34075	1	0	1.144	1144	0	0	1	0	0	0	0	0	0	1	1	0	1	1	1	0	1	0	0	0
11	10	22	Carson_1993	Carson_19911993	Temporal Reliability of Estimates from Contingent Valuation	1997	14	Land Economics	United States	North-America	1	0	0	1	0	0	0	1	26464.9	10.1836	52.81		1.45389	76.7797	4.34094	1	0	1.144	1144	0	0	1	0	0	0	0	0	0	1	1	0	1	1	1	0	1	0	0	0
12	11	23	Ekstrand	Ekstrand	Incorporating respondent uncertainty when estimating willingness to pay for protecting critical habitat for threatened and endangered fish	1998	18	Water Resources Research	United States	North-America	1	0	0	0	1	0	0	1	31572.7	10.36	50		1.43828	71.9139	4.27547	1	0	0.718	718	1	1	1	0	0	0	0	0	0	0	1	0	1	0	0	1	0	0	0	0
12	11	24	Ekstrand	Ekstrand	Incorporating respondent uncertainty when estimating willingness to pay for protecting critical habitat for threatened and endangered fish	1998	18	Water Resources Research	United States	North-America	1	0	0	0	1	0	0	1	31572.7	10.36	268		1.43828	385.458	5.95443	1	0	0.718	718	1	1	1	0	0	0	0	0	0	0	1	0	1	0	0	1	0	0	0	0
13	12	25	Hageman	Hageman	Valuing marine mammal populations	1985	5	Southwest Fisheries Center	United States	North-America	0	0	0	0	0	1	1	1	19897.9	9.89837	12.2		1.98148	24.1741	3.18528	1	0	0.172	172	0	1	1	0	0	0	0	0	1	0	1	1	0	0	0	0	0	0	1	1
13	12	26	Hageman	Hageman	Valuing marine mammal populations	1985	5	Southwest Fisheries Center	United States	North-America	0	0	0	0	0	1	1	1	19897.9	9.89837	13.62		1.98148	26.9878	3.29538	1	0	0.174	174	0	1	1	0	0	0	0	0	1	0	1	1	0	0	0	0	0	0	1	1
13	12	27	Hageman	Hageman	Valuing marine mammal populations	1985	5	Southwest Fisheries Center	United States	North-America	0	0	0	0	0	1	1	1	19897.9	9.89837	13.5		1.98148	26.75	3.28653	1	0	0.174	174	0	1	1	0	0	0	0	0	1	0	1	1	0	0	0	0	0	0	1	1
14	13	28	Hanley	Hanley	Aggregating the benefits of environmental improvements: distance-decay functions for use and non-use values	2003	22	Journal of Environmental Management	United Kingdom	Europe	1	0	0	1	0	1	1	0	27462.6	10.2206	2.78	1.43534	1.30767	5.21794	1.6521	0	0	0.3	300	1	1	1	1	0	1	0	0	0	0	0	0	0	1	1	0	0	1	0	1
14	13	29	Hanley	Hanley	Aggregating the benefits of environmental improvements: distance-decay functions for use and non-use values	2003	22	Journal of Environmental Management	United Kingdom	Europe	1	0	0	1	0	1	1	0	27462.6	10.2206	29.76	1.43534	1.30767	55.8582	4.02282	0	0	0.3	300	1	1	1	1	0	1	0	0	0	0	0	0	0	1	1	0	0	1	0	1
15	14	30	Reaves	Reaves	Does Question Format Matter? Valuing an Endangered Species	1999	18	Environmental and Resource Economics	United States	North-America	1	0	0	1	1	0	0	1	31572.7	10.36	10.28		1.4166	14.5626	2.67846	1	0	0.56	560	1	1	0	0	0	0	0	0	0	1	1	1	0	0	0	1	0	0	0	1
15	14	31	Reaves	Reaves	Does Question Format Matter? Valuing an Endangered Species	1999	18	Environmental and Resource Economics	United States	North-America	1	0	0	1	0	1	1	1	31572.7	10.36	8.35		1.4166	11.8286	2.47052	1	0	0.56	560	1	1	0	0	0	0	0	0	0	1	1	1	0	0	0	1	0	0	0	1
15	14	32	Reaves	Reaves	Does Question Format Matter? Valuing an Endangered Species	1999	18	Environmental and Resource Economics	United States	North-America	1	0	0	0	0	0	0	1	31572.7	10.36	13.25		1.4166	18.7699	2.93226	1	0	0.56	560	1	1	0	0	0	0	0	0	0	1	1	1	0	0	0	1	0	0	0	1
15	14	33	Reaves	Reaves	Does Question Format Matter? Valuing an Endangered Species	1999	18	Environmental and Resource Economics	United States	North-America	1	0	0	1	1	0	0	1	31572.7	10.36	8.42		1.4166	11.9278	2.47887	1	0	0.56	560	1	1	0	0	0	0	0	0	0	1	1	1	0	0	0	1	0	0	0	0
15	14	34	Reaves	Reaves	Does Question Format Matter? Valuing an Endangered Species	1999	18	Environmental and Resource Economics	United States	North-America	1	0	0	1	0	1	1	1	31572.7	10.36	7.57		1.4166	10.7237	2.37245	1	0	0.56	560	1	1	0	0	0	0	0	0	0	1	1	1	0	0	0	1	0	0	0	0
15	14	35	Reaves	Reaves	Does Question Format Matter? Valuing an Endangered Species	1999	18	Environmental and Resource Economics	United States	North-America	1	0	0	0	0	0	0	1	31572.7	10.36	10.29		1.4166	14.5768	2.67943	1	0	0.56	560	1	1	0	0	0	0	0	0	0	1	1	1	0	0	0	1	0	0	0	0
16	15	36	Rollins	Rollins	The Case for Diminishing Marginal Existence Values	1998	16	Journal of Environmental Economics and Management	Canada	North-America	1	0	0	0	0	0	0	1	23354.3	10.0585	105.45		1.43828	151.666	5.02168	0	0	0.266	266	0	0	1	1	0	0	0	1	0	0	0	0	0	0	0	0	0	0	0	0
16	15	37	Rollins	Rollins	The Case for Diminishing Marginal Existence Values	1998	16	Journal of Environmental Economics and Management	Canada	North-America	1	0	0	0	0	0	0	1	23354.3	10.0585	161.85		1.43828	232.785	5.45012	0	0	0.173	173	0	0	1	1	0	0	0	1	0	0	0	0	0	0	0	0	0	0	0	0
16	15	38	Rollins	Rollins	The Case for Diminishing Marginal Existence Values	1998	16	Journal of Environmental Economics and Management	Canada	North-America	1	0	0	0	0	0	0	1	23354.3	10.0585	191.57		1.43828	275.531	5.6187	0	0	0.256	256	0	0	1	1	0	0	0	1	0	0	0	0	0	0	0	0	0	0	0	0
16	15	39	Rollins	Rollins	The Case for Diminishing Marginal Existence Values	1998	16	Journal of Environmental Economics and Management	Canada	North-America	1	0	0	0	0	0	0	1	23354.3	10.0585	188.44		1.43828	271.029	5.60223	0	0	0.73	730	0	0	1	1	0	0	0	1	0	0	0	0	0	0	0	0	0	0	0	0
16	15	40	Rollins	Rollins	The Case for Diminishing Marginal Existence Values	1998	16	Journal of Environmental Economics and Management	Canada	North-America	1	0	0	0	0	0	0	1	23354.3	10.0585	235.18		1.43828	338.254	5.8238	0	0	0.267	267	0	0	1	1	0	0	0	1	0	0	0	0	0	1	0	0	0	0	0	0
16	15	41	Rollins	Rollins	The Case for Diminishing Marginal Existence Values	1998	16	Journal of Environmental Economics and Management	Canada	North-America	1	0	0	0	0	0	0	1	23354.3	10.0585	261.51		1.43828	376.124	5.92992	0	0	0.268	268	0	0	1	1	0	0	0	1	0	0	0	0	0	1	0	0	0	0	0	0
17	16	42	Sanders	Sanders	Toward Empirical Estimation of Total Value of Protecting Rivers	1990	4	Water Resources Research	United States	North-America	1	0	0	1	1	0	0	1	19216.1	9.8635	25.97		1.69859	44.1124	3.78674	0	0	0.163	163	0	1	1	1	0	1	0	0	0	0	0	0	0	0	0	1	1	0	1	1
17	16	43	Sanders	Sanders	Toward Empirical Estimation of Total Value of Protecting Rivers	1990	4	Water Resources Research	United States	North-America	1	0	0	1	1	0	0	1	19216.1	9.8635	48.5		1.69859	82.3816	4.41136	0	0	0.163	163	0	1	1	1	0	1	0	0	0	0	0	0	0	0	0	1	1	0	1	1
17	16	44	Sanders	Sanders	Toward Empirical Estimation of Total Value of Protecting Rivers	1990	4	Water Resources Research	United States	North-America	1	0	0	1	1	0	0	1	19216.1	9.8635	53		1.69859	90.0253	4.50009	0	0	0.163	163	0	1	1	1	0	1	0	0	0	0	0	0	0	0	0	1	1	0	1	1
17	16	45	Sanders	Sanders	Toward Empirical Estimation of Total Value of Protecting Rivers	1990	4	Water Resources Research	United States	North-America	1	0	0	1	1	0	0	1	19216.1	9.8635	63.88		1.69859	108.506	4.6868	0	0	0.163	163	0	1	1	1	0	1	0	0	0	0	0	0	0	0	0	1	1	0	1	1
18	17	46	Veisten_2006	Veisten_2006	Contingent valuation and actual payment for voluntarily provided passive-use values: Assessing the effect of an induced truth-telling mechanism and elicitation formats	2006	16	Applied Economics	Norway	Europe	1	0	0	1	0	0	0	0	24320.9	10.0991	41.6		1.19625	49.764	3.90729	0	0	0.758	758	0	0	1	1	0	0	0	1	0	0	0	0	0	0	0	1	0	0	0	0
18	17	47	Veisten_2006	Veisten_2006	Contingent valuation and actual payment for voluntarily provided passive-use values: Assessing the effect of an induced truth-telling mechanism and elicitation formats	2006	16	Applied Economics	Norway	Europe	1	0	0	1	1	0	0	0	24320.9	10.0991	24.6		1.19625	29.4277	3.38194	0	0	0.191	191	0	0	1	1	0	0	0	1	0	0	0	0	0	0	0	1	0	0	0	0
19	18	48	White_1997	White_1997	ECONOMIC VALUES OF THREATENED MAMMALS IN BRITAIN: A CASE STUDY OF THE OTTER Lutra lutra AND THE WATER VOLE Arvicola terrestris	1997	17	Biological Conservation	United Kingdom	Europe	1	0	0	0	0	0	0	0	21745.6	9.98717	11.91	1.41029	1.45389	24.4203	3.19542	1	0	0.1575	157.5	1	0	1	0	0	0	0	0	1	0	1	1	0	1	0	0	0	0	0	0
19	18	49	White_1997	White_1997	ECONOMIC VALUES OF THREATENED MAMMALS IN BRITAIN: A CASE STUDY OF THE OTTER Lutra lutra AND THE WATER VOLE Arvicola terrestris	1997	17	Biological Conservation	United Kingdom	Europe	1	0	0	0	0	0	0	0	21745.6	9.98717	7.44	1.41029	1.45389	15.255	2.72491	1	0	0.1575	157.5	1	0	1	0	0	0	0	0	1	0	1	0	1	1	0	0	0	0	0	0
20	19	50	Whitehead_1995	Whitehead_1995	Assessing the Validity and Reliability of Contingent Values: A Comparison of On-Site Users, Off-Site Users, and Non-users	1995	11	Journal of Environmental Economics and Management	United States	North-America	1	0	0	1	0	0	0	1	23954.5	10.0839	55.76		1.50577	83.9615	4.43036	0	0	0.518	518	0	1	1	1	0	1	0	0	0	0	0	0	0	1	0	0	0	1	0	1
21	20	51	Bennet	Bennet	using direct questioning to value the existence [,,]	1984	0	Australian Journal of Agricultural Economics	Australia	Oceania	1	0	0	1	0	1	1	0	10437.6	9.25317	27.08		2.04488	55.3753	4.01413	0	0	0.544	544	0	0	0	0	0	0	0	1	0	0	0	0	0	1	1	0	0	0	0	0
22	21	52	Subade	Subade	Do non-users value coral reefs?: Economic valuation of conserving Tubbataha Reefs, Philippines☆	2005	23	Ecological Economics	Philippines	Asia	1	0	0	0	0	0	0	0	3554.91	8.17609	562.37	0.0646578	1.233	44.8339	3.80296	0	0	0.399	399	0	1	1	1	1	0	0	0	0	0	0	0	0	1	0	1	0	0	0	0
22	21	53	Subade	Subade	Do non-users value coral reefs?: Economic valuation of conserving Tubbataha Reefs, Philippines☆	2005	23	Ecological Economics	Philippines	Asia	1	0	0	0	0	0	0	0	3554.91	8.17609	1026.12	0.0646578	1.233	81.8055	4.40434	0	0	0.399	399	0	1	1	1	1	0	0	0	0	0	0	0	0	1	0	1	0	0	0	0
22	21	54	Subade	Subade	Do non-users value coral reefs?: Economic valuation of conserving Tubbataha Reefs, Philippines☆	2005	23	Ecological Economics	Philippines	Asia	1	0	0	0	0	0	0	0	3554.91	8.17609	485.78	0.0646578	1.233	38.7279	3.65656	0	0	0.399	399	0	1	1	1	1	0	0	0	0	0	0	0	0	1	0	1	0	0	0	1
22	21	55	Subade	Subade	Do non-users value coral reefs?: Economic valuation of conserving Tubbataha Reefs, Philippines☆	2005	23	Ecological Economics	Philippines	Asia	1	0	0	0	0	0	0	0	3554.91	8.17609	874.34	0.0646578	1.233	69.7051	4.24427	0	0	0.399	399	0	1	1	1	1	0	0	0	0	0	0	0	0	1	0	1	0	0	0	1
22	21	56	Subade	Subade	Do non-users value coral reefs?: Economic valuation of conserving Tubbataha Reefs, Philippines☆	2005	23	Ecological Economics	Philippines	Asia	1	0	0	1	0	0	0	0	3554.91	8.17609	437.28	0.0646578	1.233	34.8613	3.55138	0	0	0.399	399	0	1	1	1	1	0	0	0	0	0	0	0	0	1	0	1	0	0	0	0
22	21	57	Subade	Subade	Do non-users value coral reefs?: Economic valuation of conserving Tubbataha Reefs, Philippines☆	2005	23	Ecological Economics	Philippines	Asia	1	0	0	1	0	0	0	0	3554.91	8.17609	780	0.0646578	1.233	62.184	4.1301	0	0	0.399	399	0	1	1	1	1	0	0	0	0	0	0	0	0	1	0	1	0	0	0	0
22	21	58	Subade	Subade	Do non-users value coral reefs?: Economic valuation of conserving Tubbataha Reefs, Philippines☆	2005	23	Ecological Economics	Philippines	Asia	1	0	0	1	0	0	0	0	3554.91	8.17609	363.17	0.0646578	1.233	28.953	3.36568	0	0	0.399	399	0	1	1	1	1	0	0	0	0	0	0	0	0	1	0	1	0	0	0	1
22	21	59	Subade	Subade	Do non-users value coral reefs?: Economic valuation of conserving Tubbataha Reefs, Philippines☆	2005	23	Ecological Economics	Philippines	Asia	1	0	0	1	0	0	0	0	3554.91	8.17609	638.63	0.0646578	1.233	50.9136	3.93013	0	0	0.399	399	0	1	1	1	1	0	0	0	0	0	0	0	0	1	0	1	0	0	0	1
22	21	60	Subade	Subade	Do non-users value coral reefs?: Economic valuation of conserving Tubbataha Reefs, Philippines☆	2005	23	Ecological Economics	Philippines	Asia	1	0	0	0	0	0	0	0	3554.91	8.17609	261.37	0.0646578	1.233	20.8372	3.03674	0	0	0.166	166	0	1	1	1	1	0	0	0	0	0	0	0	0	0	0	1	0	0	0	0
22	21	61	Subade	Subade	Do non-users value coral reefs?: Economic valuation of conserving Tubbataha Reefs, Philippines☆	2005	23	Ecological Economics	Philippines	Asia	1	0	0	0	0	0	0	0	3554.91	8.17609	1010.99	0.0646578	1.233	80.5993	4.38949	0	0	0.166	166	0	1	1	1	1	0	0	0	0	0	0	0	0	0	0	1	0	0	0	0
22	21	62	Subade	Subade	Do non-users value coral reefs?: Economic valuation of conserving Tubbataha Reefs, Philippines☆	2005	23	Ecological Economics	Philippines	Asia	1	0	0	0	0	0	0	0	3554.91	8.17609	209.29	0.0646578	1.233	16.6852	2.81452	0	0	0.198	198	0	1	1	1	1	0	0	0	0	0	0	0	0	0	0	1	0	0	0	1
22	21	63	Subade	Subade	Do non-users value coral reefs?: Economic valuation of conserving Tubbataha Reefs, Philippines☆	2005	23	Ecological Economics	Philippines	Asia	1	0	0	0	0	0	0	0	3554.91	8.17609	829.94	0.0646578	1.233	66.1654	4.19216	0	0	0.198	198	0	1	1	1	1	0	0	0	0	0	0	0	0	0	0	1	0	0	0	1
22	21	64	Subade	Subade	Do non-users value coral reefs?: Economic valuation of conserving Tubbataha Reefs, Philippines☆	2005	23	Ecological Economics	Philippines	Asia	1	0	0	1	0	0	0	0	3554.91	8.17609	233	0.0646578	1.233	18.5755	2.92184	0	0	0.166	166	0	1	1	1	1	0	0	0	0	0	0	0	0	0	0	1	0	0	0	0
22	21	65	Subade	Subade	Do non-users value coral reefs?: Economic valuation of conserving Tubbataha Reefs, Philippines☆	2005	23	Ecological Economics	Philippines	Asia	1	0	0	1	0	0	0	0	3554.91	8.17609	754.99	0.0646578	1.233	60.1901	4.09751	0	0	0.166	166	0	1	1	1	1	0	0	0	0	0	0	0	0	0	0	1	0	0	0	0
22	21	66	Subade	Subade	Do non-users value coral reefs?: Economic valuation of conserving Tubbataha Reefs, Philippines☆	2005	23	Ecological Economics	Philippines	Asia	1	0	0	1	0	0	0	0	3554.91	8.17609	189.18	0.0646578	1.233	15.082	2.7135	0	0	0.198	198	0	1	1	1	1	0	0	0	0	0	0	0	0	0	0	1	0	0	0	1
22	21	67	Subade	Subade	Do non-users value coral reefs?: Economic valuation of conserving Tubbataha Reefs, Philippines☆	2005	23	Ecological Economics	Philippines	Asia	1	0	0	1	0	0	0	0	3554.91	8.17609	618.21	0.0646578	1.233	49.2856	3.89763	0	0	0.198	198	0	1	1	1	1	0	0	0	0	0	0	0	0	0	0	1	0	0	0	1
23	22	68	Berrens	Berrens	Valuing the Protection of Minimum Instream Flows in New Mexico	1996	16	Journal of Agricultural and Resource Economics	United States	North-America	1	0	0	0	0	0	0	1	28782.2	10.2675	28.73		1.47877	42.4851	3.74915	1	0	0.284	284	1	1	1	0	0	0	0	0	0	0	1	1	0	1	0	1	0	0	0	0
23	22	69	Berrens	Berrens	Valuing the Protection of Minimum Instream Flows in New Mexico	1996	17	Journal of Agricultural and Resource Economics	United States	North-America	1	0	0	0	0	0	0	1	30068.2	10.3112	89.68		1.47877	132.616	4.88746	0	0	0.277	277	1	1	1	0	0	1	0	0	0	0	0	0	0	1	0	1	0	0	0	0
24	23	70	Brown_1996	Brown_1996	Which response format reveals the truth about donations to a public good	1996	14	Land Economics	United States	North-America	1	0	0	0	0	0	0	1	26464.9	10.1836	46.55		1.47877	68.8367	4.23174	0	0	0.345	345	1	0	0	1	0	0	0	1	0	0	0	0	0	0	0	1	0	0	0	0
24	23	71	Brown_1996	Brown_1996	Which response format reveals the truth about donations to a public good	1996	14	Land Economics	United States	North-America	1	0	0	0	1	0	0	1	26464.9	10.1836	18.98		1.47877	28.067	3.3346	0	0	0.159	159	1	0	0	1	0	0	0	1	0	0	0	0	0	0	0	1	0	0	0	0
25	23	72	Champ	Brown_1996	Using Donation Mechanisms to Value Nonuse Benefits from Public Goods	1997	14	Journal of Environmental Economics and Management	United States	North-America	1	0	0	0	0	0	0	1	26464.9	10.1836	46		1.45389	66.8788	4.20288	0	0	0.393	393	1	0	0	1	0	0	0	1	0	0	0	0	0	0	0	1	0	0	0	0
25	23	73	Champ	Brown_1996	Using Donation Mechanisms to Value Nonuse Benefits from Public Goods	1997	15	Journal of Environmental Economics and Management	United States	North-America	1	0	0	0	0	0	0	1	27776.6	10.232	52		1.45389	75.6021	4.32548	0	0	0.112	112	1	0	0	1	0	0	0	1	0	0	0	0	0	0	0	1	0	0	0	0
25	23	74	Champ	Brown_1996	Using Donation Mechanisms to Value Nonuse Benefits from Public Goods	1997	15	Journal of Environmental Economics and Management	United States	North-America	1	0	0	0	0	0	0	1	27776.6	10.232	12		1.45389	17.4466	2.85915	0	0	0.112	112	1	0	0	1	0	0	0	1	0	0	0	0	0	0	0	1	0	0	0	0
26	24	75	Stanley	Stanley	LOCAL PERCEPTION OF PUBLIC GOODS: RECENT ASSESSMENTS OF WILLINGNESS-TO-PAY FOR ENDANGERED SPECIES	2005	22	Contemporary Economic Policy	United States	North-America	1	0	0	1	0	1	1	1	37273.6	10.526	24.85		1.233	30.6401	3.42231	1	0	0.242	242	1	1	1	0	0	0	0	0	0	0	1	1	0	0	0	0	0	0	0	0
26	24	76	Stanley	Stanley	LOCAL PERCEPTION OF PUBLIC GOODS: RECENT ASSESSMENTS OF WILLINGNESS-TO-PAY FOR ENDANGERED SPECIES	2005	22	Contemporary Economic Policy	United States	North-America	1	0	0	1	0	1	1	1	37273.6	10.526	28.23		1.233	34.8076	3.54984	1	0	0.242	242	1	1	1	0	0	0	0	0	0	0	1	1	0	0	0	0	0	0	0	1
26	24	77	Stanley	Stanley	LOCAL PERCEPTION OF PUBLIC GOODS: RECENT ASSESSMENTS OF WILLINGNESS-TO-PAY FOR ENDANGERED SPECIES	2005	22	Contemporary Economic Policy	United States	North-America	1	0	0	1	0	1	1	1	37273.6	10.526	52.12		1.233	64.264	4.163	1	0	0.281	281	1	1	1	0	0	0	0	0	0	1	1	0	1	0	0	0	0	0	0	0
26	24	78	Stanley	Stanley	LOCAL PERCEPTION OF PUBLIC GOODS: RECENT ASSESSMENTS OF WILLINGNESS-TO-PAY FOR ENDANGERED SPECIES	2005	22	Contemporary Economic Policy	United States	North-America	1	0	0	1	0	1	1	1	37273.6	10.526	59.06		1.233	72.821	4.288	1	0	0.281	281	1	1	1	0	0	0	0	0	0	1	1	0	1	0	0	0	0	0	0	1
26	24	79	Stanley	Stanley	LOCAL PERCEPTION OF PUBLIC GOODS: RECENT ASSESSMENTS OF WILLINGNESS-TO-PAY FOR ENDANGERED SPECIES	2005	22	Contemporary Economic Policy	United States	North-America	1	0	0	0	0	1	1	1	37273.6	10.526	29.56		1.233	36.4475	3.59587	1	0	0.21	210	1	1	1	0	0	0	0	0	0	1	1	0	1	0	0	0	0	0	0	1
26	24	80	Stanley	Stanley	LOCAL PERCEPTION OF PUBLIC GOODS: RECENT ASSESSMENTS OF WILLINGNESS-TO-PAY FOR ENDANGERED SPECIES	2005	22	Contemporary Economic Policy	United States	North-America	1	0	0	0	0	1	1	1	37273.6	10.526	56.41		1.233	69.5536	4.2421	1	0	0.234	234	1	1	1	0	0	0	0	0	0	1	1	0	1	0	0	0	0	0	0	1
27	25	81	Willis	Willis	Benefits of Environmentally Sensitive Area Policy in England: A Contingent Valuation Assessment	1995	14	Journal of Environmental Management	United Kingdom	Europe	1	0	0	1	0	1	1	0	18499	9.82547	36.65	1.40044	1.50577	77.2852	4.3475	0	0	0.534	534	0	1	1	1	0	0	1	0	0	0	0	0	0	1	1	0	0	0	0	0
28	26	82	Carneiro	Carneiro	Payment vehicle as an instrument to elicit economic demand for conservation	2014	34	Ocean and Coastal management	Brazil	South-America	1	0	0	1	1	0	0	0	15971	9.67853	38.56		1.04216	40.1857	3.69351	0	0	0.445	445	0	1	0	1	1	0	0	0	0	0	0	0	0	1	1	0	0	0	0	0
28	26	83	Carneiro	Carneiro	Payment vehicle as an instrument to elicit economic demand for conservation	2014	34	Ocean and Coastal management	Brazil	South-America	1	0	0	1	1	0	0	0	15971	9.67853	10.91		1.04216	11.37	2.43098	0	0	0.445	445	0	1	0	1	1	0	0	0	0	0	0	0	0	1	1	1	0	0	0	0
29	27	84	Martinez_Paz	Martinez_Paz	A probabilistic approach for the socioeconomic assessment of urban river rehabilitation projects	2014	33	Land Use Policy	Spain	Europe	1	0	0	1	0	0	0	0	31988.3	10.3731	19.42	1.50976	1.04216	30.5556	3.41955	0	1	0.062	62	1	1	1	1	0	1	0	0	0	0	0	0	0	1	1	0	0	1	0	1
30	28	85	Kontogianni	Kontogianni	Service providing units, existence values and the valuation of endangered species: A methodological test	2012	30	Ecological Economics	Greece	Europe	1	0	0	0	1	0	0	0	30359.9	10.3209	56.8	1.46057	1.078	89.4312	4.49347	1	0	0.181	181	0	1	1	0	0	0	0	0	1	0	1	1	0	1	0	0	0	0	1	1
31	29	86	Chang	Chang	Social Benefits of Controlling Forest Insect Outbreaks: A Contingent Valuation Analysis in Two Canadian Provinces	2011	28	Canadian Journal of Agricultural Economics	Canada	North-America	1	0	0	0	0	0	0	1	39442	10.5826	13.4316		1.09785	14.7459	2.69097	0	0	0.229	229	0	1	1	1	0	0	0	1	0	0	0	0	0	0	0	0	0	0	1	0
31	29	87	Chang	Chang	Social Benefits of Controlling Forest Insect Outbreaks: A Contingent Valuation Analysis in Two Canadian Provinces	2011	28	Canadian Journal of Agricultural Economics	Canada	North-America	1	0	0	0	0	0	0	1	39442	10.5826	23.6912		1.09785	26.0095	3.25846	0	0	0.166	166	0	1	1	1	0	0	0	1	0	0	0	0	0	0	0	0	0	0	1	1
31	29	88	Chang	Chang	Social Benefits of Controlling Forest Insect Outbreaks: A Contingent Valuation Analysis in Two Canadian Provinces	2011	28	Canadian Journal of Agricultural Economics	Canada	North-America	1	0	0	0	0	0	0	1	39442	10.5826	24.2966		1.09785	26.6741	3.28369	0	0	0.229	229	0	1	1	1	0	0	0	1	0	0	0	0	0	0	0	0	0	0	1	0
31	29	89	Chang	Chang	Social Benefits of Controlling Forest Insect Outbreaks: A Contingent Valuation Analysis in Two Canadian Provinces	2011	28	Canadian Journal of Agricultural Economics	Canada	North-America	1	0	0	0	0	0	0	1	39442	10.5826	33.9589		1.09785	37.2819	3.61851	0	0	0.166	166	0	1	1	1	0	0	0	1	0	0	0	0	0	0	0	0	0	0	1	1
32	30	90	McFadden	McFadden	Contingent valuation and Social Choice	1994	11	American Journal of Agricultural Economics	United States	North-America	1	0	0	0	1	0	0	1	23954.5	10.0839	38.16		1.53717	58.6584	4.07173	0	0	1.229	1229	0	1	1	1	0	0	0	1	0	0	0	0	0	1	0	0	0	0	0	1
32	30	91	McFadden	McFadden	Contingent valuation and Social Choice	1994	11	American Journal of Agricultural Economics	United States	North-America	1	0	0	1	1	0	0	1	23954.5	10.0839	70.2		1.53717	107.909	4.68129	0	0	1.229	1229	0	1	1	1	0	0	0	1	0	0	0	0	0	1	0	0	0	0	0	1
32	30	92	McFadden	McFadden	Contingent valuation and Social Choice	1994	11	American Journal of Agricultural Economics	United States	North-America	1	0	0	0	1	0	0	1	23954.5	10.0839	346.44		1.53717	532.537	6.27765	0	0	1.229	1229	0	1	1	1	0	0	0	1	0	0	0	0	0	1	0	0	0	0	0	1
32	30	93	McFadden	McFadden	Contingent valuation and Social Choice	1994	11	American Journal of Agricultural Economics	United States	North-America	1	0	0	1	0	0	0	1	23954.5	10.0839	463.9		1.53717	713.094	6.56961	0	0	1.229	1229	0	1	1	1	0	0	0	1	0	0	0	0	0	1	0	0	0	0	0	1
32	30	94	McFadden	McFadden	Contingent valuation and Social Choice	1994	11	American Journal of Agricultural Economics	United States	North-America	1	0	0	0	0	0	0	1	23954.5	10.0839	664.15		1.53717	1020.91	6.92845	0	0	1.229	1229	0	1	1	1	0	0	0	1	0	0	0	0	0	1	0	0	0	0	0	1
32	30	95	McFadden	McFadden	Contingent valuation and Social Choice	1994	11	American Journal of Agricultural Economics	United States	North-America	1	0	0	1	0	0	0	1	23954.5	10.0839	923.4		1.53717	1419.42	7.25801	0	0	1.229	1229	0	1	1	1	0	0	0	1	0	0	0	0	0	1	0	0	0	0	0	1
32	30	96	McFadden	McFadden	Contingent valuation and Social Choice	1994	11	American Journal of Agricultural Economics	United States	North-America	1	0	0	0	1	0	0	1	23954.5	10.0839	70.09		1.53717	107.74	4.67972	0	0	1.229	1229	0	1	1	1	0	0	0	1	0	0	0	0	0	1	0	0	0	0	0	1
32	30	97	McFadden	McFadden	Contingent valuation and Social Choice	1994	11	American Journal of Agricultural Economics	United States	North-America	1	0	0	0	0	0	0	1	23954.5	10.0839	717.47		1.53717	1102.87	7.00567	0	0	1.229	1229	0	1	1	1	0	0	0	1	0	0	0	0	0	1	0	0	0	0	0	1
32	30	98	McFadden	McFadden	Contingent valuation and Social Choice	1994	11	American Journal of Agricultural Economics	United States	North-America	1	0	0	1	0	0	0	1	23954.5	10.0839	46.6		1.53717	71.6322	4.27154	0	0	1.229	1229	0	1	1	1	0	0	0	1	0	0	0	0	0	1	0	0	0	0	0	1
32	30	99	McFadden	McFadden	Contingent valuation and Social Choice	1994	11	American Journal of Agricultural Economics	United States	North-America	1	0	0	0	0	0	0	1	23954.5	10.0839	861.2		1.53717	1323.81	7.18827	0	0	1.229	1229	0	1	1	1	0	0	0	1	0	0	0	0	0	1	0	0	0	0	0	1
32	30	100	McFadden	McFadden	Contingent valuation and Social Choice	1994	11	American Journal of Agricultural Economics	United States	North-America	1	0	0	1	0	0	0	1	23954.5	10.0839	429.9		1.53717	660.83	6.4935	0	0	1.229	1229	0	1	1	1	0	0	0	1	0	0	0	0	0	1	0	0	0	0	0	1
33	31	101	OGarra	OGarra	Bequest Values for Marine Resources: How Important for Indigenous Communities in Less-Developed Economies?	2009	28	Environmental and Resource Economics	Fiji	Oceania	1	0	0	1	0	1	0	0	6956.3	8.8474	183.9	1.05879	1.13421	220.844	5.39746	0	0	0.408	408	0	1	1	1	1	0	0	0	0	0	0	0	0	1	1	1	0	0	0	1
34	32	102	Martinez_Espineira	Martinez_Espineira	Adopt a Hypothetical Pup: A Count Data Approach to the Valuation of Wildlife	2007	26	Environmental and Resource Economics	Canada	North-America	1	0	0	0	0	1	0	1	36134.6	10.495	57.06		1.16524	66.4885	4.19703	1	0	0.235	235	0	1	0	0	0	0	0	0	1	0	1	1	0	1	0	1	0	0	0	0
35	33	103	Tisdell	Tisdell	Policies for saving a rare Australian glider: economics and ecology	2005	23	Biological Conservation	Australia	Oceania	1	0	0	1	1	0	0	0	28706.4	10.2649	28.89		1.233	35.6214	3.57295	1	0	0.204	204	0	0	0	0	0	0	0	0	1	0	1	1	0	0	0	1	0	0	0	0
36	34	104	Horton	Horton	Evaluating non-user willingness to pay for a large-scale conservation programme in Amazonia: a UK/Italian contingent valuation study	2003	21	Environmental Conservation 3	United Kingdom	Europe	1	0	0	1	0	1	0	0	26245.9	10.1753	12.94	1.43534	1.30767	24.2878	3.18997	0	0	0.103	103	0	1	1	1	0	0	0	1	0	0	0	0	0	1	1	0	0	0	0	0
36	34	105	Horton	Horton	Evaluating non-user willingness to pay for a large-scale conservation programme in Amazonia: a UK/Italian contingent valuation study	2003	21	Environmental Conservation 3	Italy	Europe	1	0	0	1	0	1	0	0	27022.9	10.2044	49.54	1.43534	1.30767	92.9844	4.53243	0	0	0.108	108	0	1	1	1	0	0	0	1	0	0	0	0	0	1	1	0	0	0	0	0
36	34	106	Horton	Horton	Evaluating non-user willingness to pay for a large-scale conservation programme in Amazonia: a UK/Italian contingent valuation study	2003	21	Environmental Conservation 3	United Kingdom	Europe	1	0	0	1	0	1	0	0	26245.9	10.1753	20.65	1.43534	1.30767	38.7591	3.65737	0	0	0.103	103	0	1	1	1	0	0	0	1	0	0	0	0	0	1	1	0	0	0	0	0
36	34	107	Horton	Horton	Evaluating non-user willingness to pay for a large-scale conservation programme in Amazonia: a UK/Italian contingent valuation study	2003	21	Environmental Conservation 3	Italy	Europe	1	0	0	1	0	1	0	0	27022.9	10.2044	40.41	1.43534	1.30767	75.8478	4.32873	0	0	0.108	108	0	1	1	1	0	0	0	1	0	0	0	0	0	1	1	0	0	0	0	0
37	35	108	Walsh_Loomis_Gillman	Walsh_Loomis_Gillman	Valuing option, existence, and bequest demand for wilderness	1984	1	Land Economics	United States	North-America	1	0	0	1	1	0	0	1	15920	9.67533	9.88		2.04488	20.2034	3.00585	0	0	0.195	195	0	1	1	1	0	0	0	1	0	0	0	0	0	0	0	1	0	0	1	1
37	35	109	Walsh_Loomis_Gillman	Walsh_Loomis_Gillman	Valuing option, existence, and bequest demand for wilderness	1984	1	Land Economics	United States	North-America	1	0	0	1	1	0	0	1	15920	9.67533	13.31		2.04488	27.2173	3.30385	0	0	0.195	195	0	1	1	1	0	0	0	1	0	0	0	0	0	0	0	1	0	0	1	1
37	35	110	Walsh_Loomis_Gillman	Walsh_Loomis_Gillman	Valuing option, existence, and bequest demand for wilderness	1984	1	Land Economics	United States	North-America	1	0	0	1	1	0	0	1	15920	9.67533	17.96		2.04488	36.726	3.60349	0	0	0.195	195	0	1	1	1	0	0	0	1	0	0	0	0	0	0	0	1	0	0	1	1
37	35	111	Walsh_Loomis_Gillman	Walsh_Loomis_Gillman	Valuing option, existence, and bequest demand for wilderness	1984	1	Land Economics	United States	North-America	1	0	0	1	1	0	0	1	15920	9.67533	22.6		2.04488	46.2143	3.83329	0	0	0.195	195	0	1	1	1	0	0	0	1	0	0	0	0	0	0	0	1	0	0	1	1
38	36	112	Walsh_Bjonback_	Walsh_Bjonback_	Estimating the public benefits of protecting forest quality	1990	4	Journal of Environmental Economics and Management	United States	North-America	1	0	0	0	0	1	0	1	19216.1	9.8635	24		1.69859	40.7662	3.70785	0	0	0.198	198	0	1	1	1	0	0	0	1	0	0	0	0	0	1	0	0	0	0	1	1
39	37	113	Oglethorpe	Oglethorpe	Economic valuation of the non-use attributes of a wetland : A case-study for Lake Kerkini	2000	18	Journal of Environmental Planning and Management	Greece	Europe	1	0	0	0	0	1	0	0	17146.2	9.74953	15.2136	1.41919	1.38508	29.9054	3.39804	0	0	0.045	45	0	1	0	1	0	1	0	0	0	0	0	0	0	1	1	1	0	0	1	1
39	37	114	Oglethorpe	Oglethorpe	Economic valuation of the non-use attributes of a wetland : A case-study for Lake Kerkini	2000	18	Journal of Environmental Planning and Management	Greece	Europe	1	0	0	0	0	1	0	0	17146.2	9.74953	6.5	1.41919	1.38508	12.777	2.54765	0	0	0.102	102	0	1	0	1	0	1	0	0	0	0	0	0	0	1	1	1	0	0	1	1
40	38	115	Gilbert	Gilbert	Valuation of Eastern Wilderness	1991	11	0	United States	North-America	0	0	0	0	1	0	0	1	23954.5	10.0839	4.69		1.64387	7.70977	2.04249	0	0	0.7	700	0	1	0	1	0	0	0	1	0	0	0	0	0	0	0	1	0	0	1	0
40	38	116	Gilbert	Gilbert	Valuation of Eastern Wilderness	1991	11	0	United States	North-America	0	0	0	0	1	0	0	1	23954.5	10.0839	4.78		1.64387	7.85771	2.0615	0	0	0.7	700	0	1	0	1	0	0	0	1	0	0	0	0	0	0	0	1	0	0	1	0
41	39	117	Sutherland	Sutherland	Effect of Distance on the Preservation Value of Water Quality	1985	2	Land Economics	United States	North-America	1	0	0	1	1	0	0	1	17406.3	9.76459	46.25		1.98148	91.6435	4.51791	0	0	0.171	171	0	0	1	1	0	1	0	0	0	0	0	0	0	0	0	1	0	0	1	0
41	39	118	Sutherland	Sutherland	Effect of Distance on the Preservation Value of Water Quality	1985	2	Land Economics	United States	North-America	1	0	0	0	1	0	0	1	17406.3	9.76459	46.47		1.98148	92.0794	4.52265	0	0	0.171	171	0	0	1	1	0	1	0	0	0	0	0	0	0	0	0	1	0	0	1	0
42	40	119	Loomis	Loomis	Do reminders of substitutes and budget constraints influence contingent valuation estimates?	1994	14	Land Economics	United States	North-America	1	0	0	0	0	0	0	1	26464.9	10.1836	90.09		1.53717	138.484	4.93075	0	0	0.22	220	0	1	1	0	0	0	0	1	0	0	0	0	0	0	0	1	0	0	0	1
43	41	120	Amirnejad	Amirnejad	Estimating the existence value of north forests of Iran by using a contingent valuation method	2006	25	Ecological Economics	Iran	Asia	1	0	0	0	0	0	0	0	13205.6	9.4884	30.12		1.19625	36.031	3.58438	0	0	0.95	950	0	1	1	1	0	0	0	1	0	0	0	0	0	1	1	0	0	0	0	0
44	42	121	Drake	Drake	Public value at risk from Phytophthora ramorum and Phytophthora kernoviae spread in England and Wales	2017	32	Journal of Environmental Management	United Kingdom	Europe	1	0	0	0	0	1	0	0	36608	10.508	1.66	1.40197	1	2.32727	0.844695	0	0	0.204	204	0	1	0	1	0	0	1	0	0	0	0	0	0	0	0	0	1	1	0	1
44	42	122	Drake	Drake	Public value at risk from Phytophthora ramorum and Phytophthora kernoviae spread in England and Wales	2017	32	Journal of Environmental Management	United Kingdom	Europe	1	0	0	0	0	1	0	0	36608	10.508	1.84	1.40197	1	2.57962	0.947643	0	0	0.158	158	0	1	0	1	0	0	0	1	0	0	0	0	0	0	0	0	1	1	0	1
44	42	123	Drake	Drake	Public value at risk from Phytophthora ramorum and Phytophthora kernoviae spread in England and Wales	2017	32	Journal of Environmental Management	United Kingdom	Europe	1	0	0	0	0	1	0	0	36608	10.508	2.34	1.40197	1	3.28061	1.18803	0	0	0.204	204	0	1	0	1	0	0	1	0	0	0	0	0	0	0	0	0	1	1	0	1
44	42	124	Drake	Drake	Public value at risk from Phytophthora ramorum and Phytophthora kernoviae spread in England and Wales	2017	32	Journal of Environmental Management	United Kingdom	Europe	1	0	0	0	0	1	0	0	36608	10.508	2.85	1.40197	1	3.99561	1.3852	0	0	0.158	158	0	1	0	1	0	0	0	1	0	0	0	0	0	0	0	0	1	1	0	1
45	43	125	Armstrong	Armstrong	USE AND NON-USE VALUES IN AN APPLIED BIOECONOMIC MODEL OF FISHERIES AND HABITAT CONNECTIONS	2015	34	Marine Resource Economics	Norway	Europe	1	1	1	0	0	0	0	0	67056.1	11.1133	209.217	0.102739	1.03098	22.1608	3.09832	0	0	4.683	212.422	1	1	1	1	1	0	0	0	0	0	0	0	0	1	1	0	0	0	0	0
46	43	126	Aanesen	Armstrong	Willingness to pay for unfamiliar public goods: 1 Preserving cold-water coral in Norway.	2015	34	Ecological Economics	Norway	Europe	1	1	0	0	0	0	0	0	67056.1	11.1133	1895.28	0.102739	1.03098	200.753	5.30207	0	0	4.683	212.422	1	1	1	1	1	0	0	0	0	0	0	0	0	1	1	0	0	0	0	0
46	43	127	Aanesen	Armstrong	Willingness to pay for unfamiliar public goods: 1 Preserving cold-water coral in Norway.	2015	34	Ecological Economics	Norway	Europe	1	1	1	0	0	0	0	0	67056.1	11.1133	2264.47	0.102739	1.03098	239.858	5.48005	0	0	4.683	212.422	1	1	1	1	1	0	0	0	0	0	0	0	0	1	1	0	0	0	0	0
47	44	128	Wallmo	Wallmo	Using choice models to inform large marine protected area design	2017	36	Marine policy	United States	North-America	1	1	1	0	0	0	0	1	56443.8	10.941	67.2549		1	67.2549	4.20849	0	0	3.354	683.634	1	1	1	1	1	0	0	0	0	0	0	0	0	0	0	0	0	0	0	0
48	45	129	Borger	Borger_2014	Motivationsmatter: Behavioural determinants of preferences for remote and unfamiliar environmental goods	2017	34	Ecological Economics	United Kingdom	Europe	1	1	1	0	0	0	0	0	39308.1	10.5792	51.4146	1.40197	1	72.0817	4.2778	0	1	5.838	524.586	1	1	1	1	1	0	0	0	0	0	0	0	0	0	0	0	0	0	0	1
48	45	130	Borger	Borger_2014	Motivationsmatter: Behavioural determinants of preferences for remote and unfamiliar environmental goods	2017	34	Ecological Economics	United Kingdom	Europe	1	1	1	0	0	0	0	0	39308.1	10.5792	40	1.40197	1	56.0787	4.02676	0	1	5.838	524.586	1	1	1	1	1	0	0	0	0	0	0	0	0	0	0	0	0	0	0	1
48	45	131	Borger	Borger_2014	Motivationsmatter: Behavioural determinants of preferences for remote and unfamiliar environmental goods	2017	34	Ecological Economics	United Kingdom	Europe	1	1	1	0	0	0	0	0	39308.1	10.5792	77.9122	1.40197	1	109.23	4.69346	0	1	5.838	524.586	1	1	1	1	1	0	0	0	0	0	0	0	0	0	0	0	0	0	0	1
48	45	132	Borger	Borger_2014	Valuing conservation benefits of an offshore marine protected area and unfamiliar environmental goods	2014	34	Ecological Economics	United Kingdom	Europe	1	1	0	0	0	0	0	0	39308.1	10.5792	28.3	1.43175	1.04216	42.2269	3.74306	0	1	17.514	524.586	1	1	1	1	1	0	0	0	0	0	0	0	0	0	0	0	0	0	0	1
48	45	133	Borger	Borger_2014	Valuing conservation benefits of an offshore marine protected area and unfamiliar environmental goods	2014	34	Ecological Economics	United Kingdom	Europe	1	1	1	0	0	0	0	0	39308.1	10.5792	56.9683	1.43175	1.04216	85.0034	4.44269	0	1	17.514	524.586	1	1	1	1	1	0	0	0	0	0	0	0	0	0	0	0	0	0	0	1
49	46	134	Kreye	Kreye	Does policy process influence public values for forest-water resource protection in Florida?	2016	32	Ecological Economics	United States	North-America	1	1	1	0	0	0	0	1	49793.7	10.8156	3.88166		1.01799	3.9515	1.3741	0	0	4.14	300.303	0	1	1	1	0	0	0	1	0	0	0	0	0	0	0	0	0	0	0	0
50	47	135	Rudd	Rudd	Non-use Economic Values for Little-Known Aquatic Species at Risk: Comparing Choice Experiment Results from Surveys Focused on Species, Guilds, and Ecosystems	2016	32	Environmental Management	Canada	North-America	1	1	0	0	0	0	0	1	41565.3	10.635	79.98	0.798505	1.01799	65.0135	4.1746	1	0	2.912	140.716	1	1	1	0	0	0	0	0	0	0	1	0	1	0	0	0	0	0	0	1
51	48	136	Morrison	Morrison	Improved wetland quality using choice modeling	1999	18	Water Resources Research	Australia	Oceania	1	1	0	0	0	0	0	0	22924.1	10.0399	102.62	0.77104	1.4166	112.087	4.71928	0	1	1.183	171.448	1	0	1	1	0	1	0	0	0	0	0	0	0	0	0	0	0	1	0	0
52	49	137	Farber, Griner	Farber, Griner	Valuing watershed quality improvements using conjoint analysis	2000	17	Ecological Economics	United States	North-America	1	1	0	0	0	0	0	1	30068.2	10.3112	48.15		1.38508	66.6917	4.20008	0	0	0.362	37.74	1	1	1	1	0	1	0	0	0	0	0	0	0	0	0	0	0	1	0	0
52	49	138	Farber, Griner	Farber, Griner	Valuing watershed quality improvements using conjoint analysis	2000	17	Ecological Economics	United States	North-America	1	1	0	0	0	0	0	1	30068.2	10.3112	41.92		1.38508	58.0626	4.06152	0	0	0.362	37.74	1	1	1	1	0	1	0	0	0	0	0	0	0	0	0	0	0	1	0	0
53	50	139	Morse-Jones	Morse-Jonges	Stated preferences for tropical wildlife conservation amongst distant beneficiaries: Charisma, endemism, scope and substitution effects	2012	30	Ecological Economics	United Kingdom	Europe	1	1	1	0	0	0	0	0	34589.6	10.4513	42.02	1.42524	1.078	64.5599	4.16759	1	0	1.998	538.604	0	1	1	0	0	0	0	0	1	1	1	0	1	0	0	1	0	0	0	1
54	51	140	Norton and Hynes	Norton and Hynes	Valuing the non-market benefits arising fromtheimplementation of theEUMarineStrategyFrameworkDirective	2014	33	Ecosystem Services	Ireland	Europe	1	1	1	0	0	0	0	0	46374.2	10.7445	144.963	1.22094	1.04216	184.453	5.2174	0	0	4.944	437.784	0	1	0	1	1	0	0	0	0	0	0	0	0	1	0	0	0	0	0	1
55	52	141	Petrolia et al.	Petrolia et al.	America's Wetland? A National Survey [..]	2014	32	Marine Resource Economics	United States	North-America	1	1	0	0	0	0	0	1	49793.7	10.8156	649		1.04216	676.363	6.51673	0	0	1.518	818.419	1	0	1	1	0	1	0	0	0	0	0	0	0	0	0	0	0	1	0	0
56	53	142	Jobstvogt et al.	Jobstvogt	Twenty thousand sterling under the sea: Estimating the value of protecting deep-sea biodiversity	2014	31	Ecological Economics	Scotland	Europe	1	1	0	0	0	0	0	0	35875.5	10.4878	81.2283	1.43175	1.04216	121.202	4.79746	0	1	7.146	214.04	1	1	1	1	1	0	0	0	0	0	0	0	0	0	0	0	0	0	0	1
56	53	143	Jobstvogt et al.	Jobstvogt	Twenty thousand sterling under the sea: Estimating the value of protecting deep-sea biodiversity	2014	31	Ecological Economics	Scotland	Europe	1	1	1	0	0	0	0	0	35875.5	10.4878	76.9211	1.43175	1.04216	114.775	4.74298	0	1	7.146	214.04	1	1	1	1	1	0	0	0	0	0	0	0	0	0	0	0	0	0	0	1
57	54	144	Schaafsma	Schaafsma	Directional heterogeneity in WTP models for environmental valuation	2012	30	Ecological Economics	Netherlands	Europe	1	1	1	0	0	0	0	0	44037.4	10.6928	127.9	1.21299	1.078	167.242	5.11944	0	1	3.184	479.298	1	1	1	1	0	1	0	0	0	0	0	0	0	0	0	0	0	1	0	1
57	54	145	Schaafsma	Schaafsma	Directional heterogeneity in WTP models for environmental valuation	2012	30	Ecological Economics	Netherlands	Europe	1	1	1	0	0	0	0	0	44037.4	10.6928	159.075	1.21299	1.078	208.007	5.33757	0	1	3.184	479.298	1	1	1	1	0	1	0	0	0	0	0	0	0	0	0	0	0	1	0	1
57	54	146	Schaafsma	Schaafsma	Directional heterogeneity in WTP models for environmental valuation	2012	30	Ecological Economics	Netherlands	Europe	1	1	1	0	0	0	0	0	44037.4	10.6928	153.8	1.21299	1.078	201.109	5.30385	0	1	3.184	479.298	1	1	1	1	0	1	0	0	0	0	0	0	0	0	0	0	0	1	0	1
57	54	147	Schaafsma	Schaafsma	Directional heterogeneity in WTP models for environmental valuation	2012	30	Ecological Economics	Netherlands	Europe	1	1	1	0	0	0	0	0	44037.4	10.6928	137.225	1.21299	1.078	179.436	5.18982	0	1	3.184	479.298	1	1	1	1	0	1	0	0	0	0	0	0	0	0	0	0	0	1	0	1
57	54	148	Schaafsma	Schaafsma	Directional heterogeneity in WTP models for environmental valuation	2012	30	Ecological Economics	Netherlands	Europe	1	1	1	0	0	0	0	0	44037.4	10.6928	160.325	1.21299	1.078	209.641	5.3454	0	1	3.184	479.298	1	1	1	1	0	1	0	0	0	0	0	0	0	0	0	0	0	1	0	1
57	54	149	Schaafsma	Schaafsma	Directional heterogeneity in WTP models for environmental valuation	2012	30	Ecological Economics	Netherlands	Europe	1	1	1	0	0	0	0	0	44037.4	10.6928	139.85	1.21299	1.078	182.868	5.20877	0	1	3.184	479.298	1	1	1	1	0	1	0	0	0	0	0	0	0	0	0	0	0	1	0	1
58	55	150	McVittie	McVittie	Valuing the non-use benefits of marine conservation zones: An application to the UK Marine Bill	2010	29	Ecological Economics	United Kingdom	Europe	1	1	1	0	0	0	0	0	36257.5	10.4984	70.5333	1.42528	1.12052	112.646	4.72425	0	0	1.27	684.712	1	1	1	1	1	0	0	0	0	0	0	0	0	1	1	0	0	0	0	0
58	55	151	McVittie	McVittie	Valuing the non-use benefits of marine conservation zones: An application to the UK Marine Bill	2010	29	Ecological Economics	United Kingdom	Europe	1	1	1	0	0	0	0	0	36257.5	10.4984	24.0392	1.42528	1.12052	38.3921	3.64785	0	0	0.799	430.775	1	1	1	1	1	0	0	0	0	0	0	0	0	1	1	0	0	0	0	0
58	55	152	McVittie	McVittie	Valuing the non-use benefits of marine conservation zones: An application to the UK Marine Bill	2010	29	Ecological Economics	United Kingdom	Europe	1	1	1	0	0	0	0	0	36257.5	10.4984	57.6923	1.42528	1.12052	92.1381	4.52329	0	0	0.837	451.263	1	1	1	1	1	0	0	0	0	0	0	0	0	1	1	0	0	0	0	0
58	55	153	McVittie	McVittie	Valuing the non-use benefits of marine conservation zones: An application to the UK Marine Bill	2010	29	Ecological Economics	United Kingdom	Europe	1	1	1	0	0	0	0	0	36257.5	10.4984	37.9833	1.42528	1.12052	60.6617	4.10531	0	0	0.822	443.176	1	1	1	1	1	0	0	0	0	0	0	0	0	1	1	0	0	0	0	0
59	56	154	Windle and Rolfe	Windle and Rolfe	Assessing Non-use Values for Environmental Protection of an Estuary in a Great Barrier Reef Catchment	2005	24	Australian Journal of Environmental Management	Australia	Oceania	1	1	0	0	0	0	0	0	29678.5	10.2982	377.122	0.720276	1.233	334.922	5.8139	0	0	1.208	81.4106	1	1	1	1	0	1	0	0	0	0	0	0	0	0	0	0	0	0	0	0
60	57	155	Logar	Logar	Do the societal benefits of river restoration outweigh their costs? A costbenefit analysis	2019	36	Journal of Environmental Management	Switzerland	Europe	1	1	1	0	0	0	0	0	63648.3	11.0611	30.4091	0.819534	1	24.9213	3.21572	0	0	1.398	134.786	1	1	1	1	0	1	0	0	0	0	0	0	0	1	1	0	0	0	0	1
60	57	156	Logar	Logar	Do the societal benefits of river restoration outweigh their costs? A costbenefit analysis	2019	36	Journal of Environmental Management	Switzerland	Europe	1	1	1	0	0	0	0	0	63648.3	11.0611	30.1059	0.819534	1	24.6728	3.2057	0	0	1.41	134.786	1	1	1	1	0	1	0	0	0	0	0	0	0	1	1	0	0	0	0	1
61	58	157	Jacobsen	Jacobsen	Valuation of wildlife populations above survival	2012	36	Biodiversity Conservation	Denmark	Europe	1	1	1	0	0	0	0	0	48674.8	10.7929	9.12	0.132203	1.078	1.29973	0.262157	1	0	4.348	208.648	1	1	1	0	0	0	0	0	1	1	1	0	1	0	0	0	0	0	0	1
62	59	158	Hoyos	Hoyos	Valuing a Natura 2000 network site to inform land use options using a discrete choice experiment: An illustration from the Basque Country	2012	31	Journal of Forest Economics	Spain	Europe	1	1	1	0	0	0	0	0	31954.2	10.3721	40.2855	1.4389	1.078	62.4881	4.13498	0	1	1.326	119.151	0	1	0	1	0	0	0	1	0	0	0	0	0	1	0	1	0	0	0	1
62	59	159	Hoyos	Hoyos	Valuing a Natura 2000 network site to inform land use options using a discrete choice experiment: An illustration from the Basque Country	2012	31	Journal of Forest Economics	Spain	Europe	1	1	0	0	0	0	0	0	31954.2	10.3721	7.43935	1.4389	1.078	11.5394	2.44577	0	1	1.326	119.151	0	1	0	1	0	0	0	1	0	0	0	0	0	1	0	1	0	0	0	1
[truncated: 6 more columns]

## Sheet: Metadata_excluding_outliers
StudyID	DataID	ObsID	Author	Sample data (Location_Year)	Title	Publication year	Study year	Journal	Country	Contingent	Published in peer-reviewed journal	CE	CE_Mixed logit	CV_Non-parametric	OE	Other	CV-Payment Card	North-America	GDP (GDP per capita in current (2017) US$ PPP in the data collection year)	ln_GDP	Mean WTP (as in original study)	Conversion factor from local currency to PPP US$ (year of study) (only if original estimate not in US$)	Conversion factor from year of study to current (2017) US$ PPP	Mean WTP	Ln_WTP	Species abundance	Species richness	Sample size / 1000	Rel_weights	WTP Measure is a gain (Compensating Surplus)	Payment interval (annual)	Unit (per household)	Habitat focused	Marine	Wetland	Grassland_Shrubland	Forest	Mammals	Birds	Species focused	Single species	Multiple species	Interviewer (face-to-face or telephone)	Face-to-face	Payment vehicle (voluntary)	Is the outcome uncertain?	Non-use value isolated by excluding users based on past or intended recreational use?	Non-use value isolated by allocation of TEV/NUV to existence and bequest value components?	Protest responses are removed
1	1	1	Bateman	Bateman	‘Non-user’s WTP for a National Park: An Application and Critique of the Contingent Valuation Method’	1997	16	Regional Studies 31, 571–582	United Kingdom	Europe	1	0	0	1	1	0	0	0	20423.5	9.92444	12.29	1.41029	1.45389	25.1995	3.22682	0	0	0.11	110	0	1	0	1	0	1	0	0	0	0	0	0	0	0	0	0	0	1	0	0
2	2	2	Shechter	Shechter	Measuring passive use value: Pledges, donations and CV responses in connection with an important natural resource	1998	14	Environmental and Resource Economics	Israel	Asia	1	0	0	1	1	0	0	0	17431.2	9.76602	29.7	0.29882	1.43828	12.7646	2.54668	0	0	0.232	232	0	0	1	1	0	0	0	1	0	0	0	0	0	1	1	1	0	1	0	0
3	3	3	Willis_1998	Willis_1998	Biodiversity values for alternative management regimes in remote UK coniferous forests: an iterative bidding polychotomous choice approach	1998	16	Environmentalist	United Kingdom	Europe	1	0	0	1	0	0	0	0	20423.5	9.92444	27.04	1.38636	1.43828	53.9169	3.98744	0	0	0.357	357	1	1	1	1	0	0	0	1	0	0	0	0	0	1	1	0	0	0	0	1
4	4	4	Broberg	Broberg	Assessing the non-timber value of old-growth forests in Sweden	2007	26	Umeå Economic Studies 712	Sweden	Europe	0	0	0	0	0	1	1	0	33967.2	10.4332	465	0.112574	1.16524	60.9968	4.11082	0	0	0.397	397	0	1	0	1	0	0	0	1	0	0	0	0	0	0	0	0	0	1	0	1
5	5	5	Borzykowski	Borzykowski	Scope Effects in Contingent Valuation: Does the Assumed Statistical Distribution of WTP Matter?	2018	38	Ecological Economics	Switzerland	Europe	1	0	0	0	1	0	0	0	64712.1	11.0777	188.42	0.819534	1	154.417	5.03965	0	0	0.12	120	1	0	0	1	0	0	0	1	0	0	0	0	0	0	0	0	0	0	0	1
5	5	6	Borzykowski	Borzykowski	Scope Effects in Contingent Valuation: Does the Assumed Statistical Distribution of WTP Matter?	2018	38	Ecological Economics	Switzerland	Europe	1	0	0	1	1	0	0	0	64712.1	11.0777	243.96	0.819534	2	399.867	5.99113	0	0	0.152	152	1	0	0	1	0	0	0	1	0	0	0	0	0	0	0	0	0	0	0	1
5	5	7	Borzykowski	Borzykowski	Scope Effects in Contingent Valuation: Does the Assumed Statistical Distribution of WTP Matter?	2018	38	Ecological Economics	Switzerland	Europe	1	0	0	1	1	0	0	0	64712.1	11.0777	341.52	0.819534	1	279.887	5.63439	0	0	0.183	183	1	0	0	1	0	0	0	1	0	0	0	0	0	0	0	0	0	0	0	1
5	5	8	Borzykowski	Borzykowski	Scope Effects in Contingent Valuation: Does the Assumed Statistical Distribution of WTP Matter?	2018	38	Ecological Economics	Switzerland	Europe	1	0	0	0	1	0	0	0	64712.1	11.0777	183.11	0.819534	1	150.065	5.01107	0	0	0.152	152	1	0	0	1	0	0	0	1	0	0	0	0	0	0	0	0	0	0	0	1
5	5	9	Borzykowski	Borzykowski	Scope Effects in Contingent Valuation: Does the Assumed Statistical Distribution of WTP Matter?	2018	38	Ecological Economics	Switzerland	Europe	1	0	0	0	1	0	0	0	64712.1	11.0777	276.69	0.819534	1	226.757	5.42388	0	0	0.183	183	1	0	0	1	0	0	0	1	0	0	0	0	0	0	0	0	0	0	0	1
5	5	10	Borzykowski	Borzykowski	Scope Effects in Contingent Valuation: Does the Assumed Statistical Distribution of WTP Matter?	2018	38	Ecological Economics	Switzerland	Europe	1	0	0	0	1	0	0	0	64712.1	11.0777	303.02	0.819534	1	248.335	5.51478	0	0	0.183	183	1	0	0	1	0	0	0	1	0	0	0	0	0	0	0	0	0	0	0	1
5	5	11	Borzykowski	Borzykowski	Scope Effects in Contingent Valuation: Does the Assumed Statistical Distribution of WTP Matter?	2018	38	Ecological Economics	Switzerland	Europe	1	0	0	1	1	0	0	0	64712.1	11.0777	97.36	0.819534	1	79.7898	4.3794	0	0	0.119	119	1	0	0	1	0	0	0	1	0	0	0	0	0	0	0	0	0	0	0	1
5	5	12	Borzykowski	Borzykowski	Scope Effects in Contingent Valuation: Does the Assumed Statistical Distribution of WTP Matter?	2018	38	Ecological Economics	Switzerland	Europe	1	0	0	1	1	0	0	0	64712.1	11.0777	126.84	0.819534	1	103.95	4.64391	0	0	0.182	182	1	0	0	1	0	0	0	1	0	0	0	0	0	0	0	0	0	0	0	1
6	6	13	Willis_1995	Willis_1995	Wildlife Enhancement Scheme	1995	15	England	United Kingdom	Europe	0	0	0	1	1	0	0	0	19575.8	9.88205	54.94	1.40044	1.50577	115.854	4.75233	0	0	0.177	177	0	1	1	1	0	1	0	0	0	0	0	0	0	1	1	1	0	1	0	1
7	7	14	Brouwer	Brouwer	Public willingness to pay for alternative management regimes of remote marine protected areas in the North Sea	2016	27	Marine Policy	Netherlands	Europe	1	0	0	1	0	0	0	0	40602.7	10.6116	87.5	1.22493	1.01799	109.11	4.69236	0	0	0.34	340	0	1	1	1	1	0	0	0	0	0	0	0	0	0	0	0	0	0	0	1
7	7	15	Brouwer	Brouwer	Public willingness to pay for alternative management regimes of remote marine protected areas in the North Sea	2016	27	Marine Policy	Netherlands	Europe	1	0	0	1	1	0	0	0	40602.7	10.6116	56.5	1.22493	1.01799	70.454	4.25496	0	0	0.398	398	0	1	1	1	1	0	0	0	0	0	0	0	0	0	0	0	0	0	0	1
8	8	16	Veisten_2004	Veisten_2004	Scope insensitivity in contingent valuation of complex environmental amenities	2004	23	Journal of Environmental Management	Norway	Europe	1	0	0	1	1	0	0	0	37959.8	10.5443	40.62		1.27267	51.696	3.94538	1	0	0.108	108	0	1	1	0	0	0	0	0	0	1	1	1	0	1	1	0	0	0	0	1
8	8	17	Veisten_2004	Veisten_2004	Scope insensitivity in contingent valuation of complex environmental amenities	2004	23	Journal of Environmental Management	Norway	Europe	1	0	0	1	1	0	0	0	37959.8	10.5443	55.38		1.27267	70.4807	4.25534	1	0	0.108	108	0	1	1	0	0	0	0	0	0	1	1	0	1	1	1	0	0	0	0	1
9	9	18	Whitehead_1991	Whitehead_1991	A link between behavior, information, and existence value	1991	10	Leisure Sciences	United States	North-America	1	0	0	0	0	0	0	1	23100	10.0476	17.48		1.64387	28.7349	3.35811	0	0	0.118	118	0	1	1	1	0	1	0	0	0	0	0	0	0	0	0	1	0	0	0	0
10	10	19	Carson_1991	Carson_19911993	Contingent Valuation and Lost Passive Use: Damages from the Exxon Valdez Oil Spill	2003	12	Environmental and Resource Economics	United States	North-America	1	0	0	0	0	0	0	1	24405.2	10.1026	79.2		1.30767	103.567	4.64022	1	0	1.203	1203	0	0	1	0	0	0	0	0	0	1	1	0	1	1	1	0	1	0	0	0
10	10	20	Carson_1991	Carson_19911993	Contingent Valuation and Lost Passive Use: Damages from the Exxon Valdez Oil Spill	2003	12	Environmental and Resource Economics	United States	North-America	1	0	0	1	0	0	0	1	24405.2	10.1026	53.6		1.30767	70.0911	4.2498	1	0	1.203	1203	0	0	1	0	0	0	0	0	0	1	1	0	1	1	1	0	1	0	0	0
11	10	21	Carson_1993	Carson_19911993	Temporal Reliability of Estimates from Contingent Valuation	1997	12	Land Economics	United States	North-America	1	0	0	1	0	0	0	1	24405.2	10.1026	52.8		1.45389	76.7652	4.34075	1	0	1.144	1144	0	0	1	0	0	0	0	0	0	1	1	0	1	1	1	0	1	0	0	0
11	10	22	Carson_1993	Carson_19911993	Temporal Reliability of Estimates from Contingent Valuation	1997	14	Land Economics	United States	North-America	1	0	0	1	0	0	0	1	26464.9	10.1836	52.81		1.45389	76.7797	4.34094	1	0	1.144	1144	0	0	1	0	0	0	0	0	0	1	1	0	1	1	1	0	1	0	0	0
12	11	23	Ekstrand	Ekstrand	Incorporating respondent uncertainty when estimating willingness to pay for protecting critical habitat for threatened and endangered fish	1998	18	Water Resources Research	United States	North-America	1	0	0	0	1	0	0	1	31572.7	10.36	50		1.43828	71.9139	4.27547	1	0	0.718	718	1	1	1	0	0	0	0	0	0	0	1	0	1	0	0	1	0	0	0	0
12	11	24	Ekstrand	Ekstrand	Incorporating respondent uncertainty when estimating willingness to pay for protecting critical habitat for threatened and endangered fish	1998	18	Water Resources Research	United States	North-America	1	0	0	0	1	0	0	1	31572.7	10.36	268		1.43828	385.458	5.95443	1	0	0.718	718	1	1	1	0	0	0	0	0	0	0	1	0	1	0	0	1	0	0	0	0
13	12	25	Hageman	Hageman	Valuing marine mammal populations	1985	5	Southwest Fisheries Center	United States	North-America	0	0	0	0	0	1	1	1	19897.9	9.89837	12.2		1.98148	24.1741	3.18528	1	0	0.172	172	0	1	1	0	0	0	0	0	1	0	1	1	0	0	0	0	0	0	1	1
13	12	26	Hageman	Hageman	Valuing marine mammal populations	1985	5	Southwest Fisheries Center	United States	North-America	0	0	0	0	0	1	1	1	19897.9	9.89837	13.62		1.98148	26.9878	3.29538	1	0	0.174	174	0	1	1	0	0	0	0	0	1	0	1	1	0	0	0	0	0	0	1	1
13	12	27	Hageman	Hageman	Valuing marine mammal populations	1985	5	Southwest Fisheries Center	United States	North-America	0	0	0	0	0	1	1	1	19897.9	9.89837	13.5		1.98148	26.75	3.28653	1	0	0.174	174	0	1	1	0	0	0	0	0	1	0	1	1	0	0	0	0	0	0	1	1
14	13	28	Hanley	Hanley	Aggregating the benefits of environmental improvements: distance-decay functions for use and non-use values	2003	22	Journal of Environmental Management	United Kingdom	Europe	1	0	0	1	0	1	1	0	27462.6	10.2206	2.78	1.43534	1.30767	5.21794	1.6521	0	0	0.3	300	1	1	1	1	0	1	0	0	0	0	0	0	0	1	1	0	0	1	0	1
14	13	29	Hanley	Hanley	Aggregating the benefits of environmental improvements: distance-decay functions for use and non-use values	2003	22	Journal of Environmental Management	United Kingdom	Europe	1	0	0	1	0	1	1	0	27462.6	10.2206	29.76	1.43534	1.30767	55.8582	4.02282	0	0	0.3	300	1	1	1	1	0	1	0	0	0	0	0	0	0	1	1	0	0	1	0	1
15	14	30	Reaves	Reaves	Does Question Format Matter? Valuing an Endangered Species	1999	18	Environmental and Resource Economics	United States	North-America	1	0	0	1	1	0	0	1	31572.7	10.36	10.28		1.4166	14.5626	2.67846	1	0	0.56	560	1	1	0	0	0	0	0	0	0	1	1	1	0	0	0	1	0	0	0	1
15	14	31	Reaves	Reaves	Does Question Format Matter? Valuing an Endangered Species	1999	18	Environmental and Resource Economics	United States	North-America	1	0	0	1	0	1	1	1	31572.7	10.36	8.35		1.4166	11.8286	2.47052	1	0	0.56	560	1	1	0	0	0	0	0	0	0	1	1	1	0	0	0	1	0	0	0	1
15	14	32	Reaves	Reaves	Does Question Format Matter? Valuing an Endangered Species	1999	18	Environmental and Resource Economics	United States	North-America	1	0	0	0	0	0	0	1	31572.7	10.36	13.25		1.4166	18.7699	2.93226	1	0	0.56	560	1	1	0	0	0	0	0	0	0	1	1	1	0	0	0	1	0	0	0	1
15	14	33	Reaves	Reaves	Does Question Format Matter? Valuing an Endangered Species	1999	18	Environmental and Resource Economics	United States	North-America	1	0	0	1	1	0	0	1	31572.7	10.36	8.42		1.4166	11.9278	2.47887	1	0	0.56	560	1	1	0	0	0	0	0	0	0	1	1	1	0	0	0	1	0	0	0	0
15	14	34	Reaves	Reaves	Does Question Format Matter? Valuing an Endangered Species	1999	18	Environmental and Resource Economics	United States	North-America	1	0	0	1	0	1	1	1	31572.7	10.36	7.57		1.4166	10.7237	2.37245	1	0	0.56	560	1	1	0	0	0	0	0	0	0	1	1	1	0	0	0	1	0	0	0	0
15	14	35	Reaves	Reaves	Does Question Format Matter? Valuing an Endangered Species	1999	18	Environmental and Resource Economics	United States	North-America	1	0	0	0	0	0	0	1	31572.7	10.36	10.29		1.4166	14.5768	2.67943	1	0	0.56	560	1	1	0	0	0	0	0	0	0	1	1	1	0	0	0	1	0	0	0	0
16	15	36	Rollins	Rollins	The Case for Diminishing Marginal Existence Values	1998	16	Journal of Environmental Economics and Management	Canada	North-America	1	0	0	0	0	0	0	1	23354.3	10.0585	105.45		1.43828	151.666	5.02168	0	0	0.266	266	0	0	1	1	0	0	0	1	0	0	0	0	0	0	0	0	0	0	0	0
16	15	37	Rollins	Rollins	The Case for Diminishing Marginal Existence Values	1998	16	Journal of Environmental Economics and Management	Canada	North-America	1	0	0	0	0	0	0	1	23354.3	10.0585	161.85		1.43828	232.785	5.45012	0	0	0.173	173	0	0	1	1	0	0	0	1	0	0	0	0	0	0	0	0	0	0	0	0
16	15	38	Rollins	Rollins	The Case for Diminishing Marginal Existence Values	1998	16	Journal of Environmental Economics and Management	Canada	North-America	1	0	0	0	0	0	0	1	23354.3	10.0585	191.57		1.43828	275.531	5.6187	0	0	0.256	256	0	0	1	1	0	0	0	1	0	0	0	0	0	0	0	0	0	0	0	0
16	15	39	Rollins	Rollins	The Case for Diminishing Marginal Existence Values	1998	16	Journal of Environmental Economics and Management	Canada	North-America	1	0	0	0	0	0	0	1	23354.3	10.0585	188.44		1.43828	271.029	5.60223	0	0	0.73	730	0	0	1	1	0	0	0	1	0	0	0	0	0	0	0	0	0	0	0	0
16	15	40	Rollins	Rollins	The Case for Diminishing Marginal Existence Values	1998	16	Journal of Environmental Economics and Management	Canada	North-America	1	0	0	0	0	0	0	1	23354.3	10.0585	235.18		1.43828	338.254	5.8238	0	0	0.267	267	0	0	1	1	0	0	0	1	0	0	0	0	0	1	0	0	0	0	0	0
16	15	41	Rollins	Rollins	The Case for Diminishing Marginal Existence Values	1998	16	Journal of Environmental Economics and Management	Canada	North-America	1	0	0	0	0	0	0	1	23354.3	10.0585	261.51		1.43828	376.124	5.92992	0	0	0.268	268	0	0	1	1	0	0	0	1	0	0	0	0	0	1	0	0	0	0	0	0
17	16	42	Sanders	Sanders	Toward Empirical Estimation of Total Value of Protecting Rivers	1990	4	Water Resources Research	United States	North-America	1	0	0	1	1	0	0	1	19216.1	9.8635	25.97		1.69859	44.1124	3.78674	0	0	0.163	163	0	1	1	1	0	1	0	0	0	0	0	0	0	0	0	1	1	0	1	1
17	16	43	Sanders	Sanders	Toward Empirical Estimation of Total Value of Protecting Rivers	1990	4	Water Resources Research	United States	North-America	1	0	0	1	1	0	0	1	19216.1	9.8635	48.5		1.69859	82.3816	4.41136	0	0	0.163	163	0	1	1	1	0	1	0	0	0	0	0	0	0	0	0	1	1	0	1	1
17	16	44	Sanders	Sanders	Toward Empirical Estimation of Total Value of Protecting Rivers	1990	4	Water Resources Research	United States	North-America	1	0	0	1	1	0	0	1	19216.1	9.8635	53		1.69859	90.0253	4.50009	0	0	0.163	163	0	1	1	1	0	1	0	0	0	0	0	0	0	0	0	1	1	0	1	1
17	16	45	Sanders	Sanders	Toward Empirical Estimation of Total Value of Protecting Rivers	1990	4	Water Resources Research	United States	North-America	1	0	0	1	1	0	0	1	19216.1	9.8635	63.88		1.69859	108.506	4.6868	0	0	0.163	163	0	1	1	1	0	1	0	0	0	0	0	0	0	0	0	1	1	0	1	1
18	17	46	Veisten_2006	Veisten_2006	Contingent valuation and actual payment for voluntarily provided passive-use values: Assessing the effect of an induced truth-telling mechanism and elicitation formats	2006	16	Applied Economics	Norway	Europe	1	0	0	1	0	0	0	0	24320.9	10.0991	41.6		1.19625	49.764	3.90729	0	0	0.758	758	0	0	1	1	0	0	0	1	0	0	0	0	0	0	0	1	0	0	0	0
18	17	47	Veisten_2006	Veisten_2006	Contingent valuation and actual payment for voluntarily provided passive-use values: Assessing the effect of an induced truth-telling mechanism and elicitation formats	2006	16	Applied Economics	Norway	Europe	1	0	0	1	1	0	0	0	24320.9	10.0991	24.6		1.19625	29.4277	3.38194	0	0	0.191	191	0	0	1	1	0	0	0	1	0	0	0	0	0	0	0	1	0	0	0	0
19	18	48	White_1997	White_1997	ECONOMIC VALUES OF THREATENED MAMMALS IN BRITAIN: A CASE STUDY OF THE OTTER Lutra lutra AND THE WATER VOLE Arvicola terrestris	1997	17	Biological Conservation	United Kingdom	Europe	1	0	0	0	0	0	0	0	21745.6	9.98717	11.91	1.41029	1.45389	24.4203	3.19542	1	0	0.1575	157.5	1	0	1	0	0	0	0	0	1	0	1	1	0	1	0	0	0	0	0	0
19	18	49	White_1997	White_1997	ECONOMIC VALUES OF THREATENED MAMMALS IN BRITAIN: A CASE STUDY OF THE OTTER Lutra lutra AND THE WATER VOLE Arvicola terrestris	1997	17	Biological Conservation	United Kingdom	Europe	1	0	0	0	0	0	0	0	21745.6	9.98717	7.44	1.41029	1.45389	15.255	2.72491	1	0	0.1575	157.5	1	0	1	0	0	0	0	0	1	0	1	0	1	1	0	0	0	0	0	0
20	19	50	Whitehead_1995	Whitehead_1995	Assessing the Validity and Reliability of Contingent Values: A Comparison of On-Site Users, Off-Site Users, and Non-users	1995	11	Journal of Environmental Economics and Management	United States	North-America	1	0	0	1	0	0	0	1	23954.5	10.0839	55.76		1.50577	83.9615	4.43036	0	0	0.518	518	0	1	1	1	0	1	0	0	0	0	0	0	0	1	0	0	0	1	0	1
21	20	51	Bennet	Bennet	using direct questioning to value the existence [,,]	1984	0	Australian Journal of Agricultural Economics	Australia	Oceania	1	0	0	1	0	1	1	0	10437.6	9.25317	27.08		2.04488	55.3753	4.01413	0	0	0.544	544	0	0	0	0	0	0	0	1	0	0	0	0	0	1	1	0	0	0	0	0
22	21	52	Subade	Subade	Do non-users value coral reefs?: Economic valuation of conserving Tubbataha Reefs, Philippines☆	2005	23	Ecological Economics	Philippines	Asia	1	0	0	0	0	0	0	0	3554.91	8.17609	562.37	0.0646578	1.233	44.8339	3.80296	0	0	0.399	399	0	1	1	1	1	0	0	0	0	0	0	0	0	1	0	1	0	0	0	0
22	21	53	Subade	Subade	Do non-users value coral reefs?: Economic valuation of conserving Tubbataha Reefs, Philippines☆	2005	23	Ecological Economics	Philippines	Asia	1	0	0	0	0	0	0	0	3554.91	8.17609	1026.12	0.0646578	1.233	81.8055	4.40434	0	0	0.399	399	0	1	1	1	1	0	0	0	0	0	0	0	0	1	0	1	0	0	0	0
22	21	54	Subade	Subade	Do non-users value coral reefs?: Economic valuation of conserving Tubbataha Reefs, Philippines☆	2005	23	Ecological Economics	Philippines	Asia	1	0	0	0	0	0	0	0	3554.91	8.17609	485.78	0.0646578	1.233	38.7279	3.65656	0	0	0.399	399	0	1	1	1	1	0	0	0	0	0	0	0	0	1	0	1	0	0	0	1
22	21	55	Subade	Subade	Do non-users value coral reefs?: Economic valuation of conserving Tubbataha Reefs, Philippines☆	2005	23	Ecological Economics	Philippines	Asia	1	0	0	0	0	0	0	0	3554.91	8.17609	874.34	0.0646578	1.233	69.7051	4.24427	0	0	0.399	399	0	1	1	1	1	0	0	0	0	0	0	0	0	1	0	1	0	0	0	1
22	21	56	Subade	Subade	Do non-users value coral reefs?: Economic valuation of conserving Tubbataha Reefs, Philippines☆	2005	23	Ecological Economics	Philippines	Asia	1	0	0	1	0	0	0	0	3554.91	8.17609	437.28	0.0646578	1.233	34.8613	3.55138	0	0	0.399	399	0	1	1	1	1	0	0	0	0	0	0	0	0	1	0	1	0	0	0	0
22	21	57	Subade	Subade	Do non-users value coral reefs?: Economic valuation of conserving Tubbataha Reefs, Philippines☆	2005	23	Ecological Economics	Philippines	Asia	1	0	0	1	0	0	0	0	3554.91	8.17609	780	0.0646578	1.233	62.184	4.1301	0	0	0.399	399	0	1	1	1	1	0	0	0	0	0	0	0	0	1	0	1	0	0	0	0
22	21	58	Subade	Subade	Do non-users value coral reefs?: Economic valuation of conserving Tubbataha Reefs, Philippines☆	2005	23	Ecological Economics	Philippines	Asia	1	0	0	1	0	0	0	0	3554.91	8.17609	363.17	0.0646578	1.233	28.953	3.36568	0	0	0.399	399	0	1	1	1	1	0	0	0	0	0	0	0	0	1	0	1	0	0	0	1
22	21	59	Subade	Subade	Do non-users value coral reefs?: Economic valuation of conserving Tubbataha Reefs, Philippines☆	2005	23	Ecological Economics	Philippines	Asia	1	0	0	1	0	0	0	0	3554.91	8.17609	638.63	0.0646578	1.233	50.9136	3.93013	0	0	0.399	399	0	1	1	1	1	0	0	0	0	0	0	0	0	1	0	1	0	0	0	1
22	21	60	Subade	Subade	Do non-users value coral reefs?: Economic valuation of conserving Tubbataha Reefs, Philippines☆	2005	23	Ecological Economics	Philippines	Asia	1	0	0	0	0	0	0	0	3554.91	8.17609	261.37	0.0646578	1.233	20.8372	3.03674	0	0	0.166	166	0	1	1	1	1	0	0	0	0	0	0	0	0	0	0	1	0	0	0	0
22	21	61	Subade	Subade	Do non-users value coral reefs?: Economic valuation of conserving Tubbataha Reefs, Philippines☆	2005	23	Ecological Economics	Philippines	Asia	1	0	0	0	0	0	0	0	3554.91	8.17609	1010.99	0.0646578	1.233	80.5993	4.38949	0	0	0.166	166	0	1	1	1	1	0	0	0	0	0	0	0	0	0	0	1	0	0	0	0
22	21	62	Subade	Subade	Do non-users value coral reefs?: Economic valuation of conserving Tubbataha Reefs, Philippines☆	2005	23	Ecological Economics	Philippines	Asia	1	0	0	0	0	0	0	0	3554.91	8.17609	209.29	0.0646578	1.233	16.6852	2.81452	0	0	0.198	198	0	1	1	1	1	0	0	0	0	0	0	0	0	0	0	1	0	0	0	1
22	21	63	Subade	Subade	Do non-users value coral reefs?: Economic valuation of conserving Tubbataha Reefs, Philippines☆	2005	23	Ecological Economics	Philippines	Asia	1	0	0	0	0	0	0	0	3554.91	8.17609	829.94	0.0646578	1.233	66.1654	4.19216	0	0	0.198	198	0	1	1	1	1	0	0	0	0	0	0	0	0	0	0	1	0	0	0	1
22	21	64	Subade	Subade	Do non-users value coral reefs?: Economic valuation of conserving Tubbataha Reefs, Philippines☆	2005	23	Ecological Economics	Philippines	Asia	1	0	0	1	0	0	0	0	3554.91	8.17609	233	0.0646578	1.233	18.5755	2.92184	0	0	0.166	166	0	1	1	1	1	0	0	0	0	0	0	0	0	0	0	1	0	0	0	0
22	21	65	Subade	Subade	Do non-users value coral reefs?: Economic valuation of conserving Tubbataha Reefs, Philippines☆	2005	23	Ecological Economics	Philippines	Asia	1	0	0	1	0	0	0	0	3554.91	8.17609	754.99	0.0646578	1.233	60.1901	4.09751	0	0	0.166	166	0	1	1	1	1	0	0	0	0	0	0	0	0	0	0	1	0	0	0	0
22	21	66	Subade	Subade	Do non-users value coral reefs?: Economic valuation of conserving Tubbataha Reefs, Philippines☆	2005	23	Ecological Economics	Philippines	Asia	1	0	0	1	0	0	0	0	3554.91	8.17609	189.18	0.0646578	1.233	15.082	2.7135	0	0	0.198	198	0	1	1	1	1	0	0	0	0	0	0	0	0	0	0	1	0	0	0	1
22	21	67	Subade	Subade	Do non-users value coral reefs?: Economic valuation of conserving Tubbataha Reefs, Philippines☆	2005	23	Ecological Economics	Philippines	Asia	1	0	0	1	0	0	0	0	3554.91	8.17609	618.21	0.0646578	1.233	49.2856	3.89763	0	0	0.198	198	0	1	1	1	1	0	0	0	0	0	0	0	0	0	0	1	0	0	0	1
23	22	68	Berrens	Berrens	Valuing the Protection of Minimum Instream Flows in New Mexico	1996	16	Journal of Agricultural and Resource Economics	United States	North-America	1	0	0	0	0	0	0	1	28782.2	10.2675	28.73		1.47877	42.4851	3.74915	1	0	0.284	284	1	1	1	0	0	0	0	0	0	0	1	1	0	1	0	1	0	0	0	0
23	22	69	Berrens	Berrens	Valuing the Protection of Minimum Instream Flows in New Mexico	1996	17	Journal of Agricultural and Resource Economics	United States	North-America	1	0	0	0	0	0	0	1	30068.2	10.3112	89.68		1.47877	132.616	4.88746	0	0	0.277	277	1	1	1	0	0	1	0	0	0	0	0	0	0	1	0	1	0	0	0	0
24	23	70	Brown_1996	Brown_1996	Which response format reveals the truth about donations to a public good	1996	14	Land Economics	United States	North-America	1	0	0	0	0	0	0	1	26464.9	10.1836	46.55		1.47877	68.8367	4.23174	0	0	0.345	345	1	0	0	1	0	0	0	1	0	0	0	0	0	0	0	1	0	0	0	0
24	23	71	Brown_1996	Brown_1996	Which response format reveals the truth about donations to a public good	1996	14	Land Economics	United States	North-America	1	0	0	0	1	0	0	1	26464.9	10.1836	18.98		1.47877	28.067	3.3346	0	0	0.159	159	1	0	0	1	0	0	0	1	0	0	0	0	0	0	0	1	0	0	0	0
25	23	72	Champ	Brown_1996	Using Donation Mechanisms to Value Nonuse Benefits from Public Goods	1997	14	Journal of Environmental Economics and Management	United States	North-America	1	0	0	0	0	0	0	1	26464.9	10.1836	46		1.45389	66.8788	4.20288	0	0	0.393	393	1	0	0	1	0	0	0	1	0	0	0	0	0	0	0	1	0	0	0	0
25	23	73	Champ	Brown_1996	Using Donation Mechanisms to Value Nonuse Benefits from Public Goods	1997	15	Journal of Environmental Economics and Management	United States	North-America	1	0	0	0	0	0	0	1	27776.6	10.232	52		1.45389	75.6021	4.32548	0	0	0.112	112	1	0	0	1	0	0	0	1	0	0	0	0	0	0	0	1	0	0	0	0
25	23	74	Champ	Brown_1996	Using Donation Mechanisms to Value Nonuse Benefits from Public Goods	1997	15	Journal of Environmental Economics and Management	United States	North-America	1	0	0	0	0	0	0	1	27776.6	10.232	12		1.45389	17.4466	2.85915	0	0	0.112	112	1	0	0	1	0	0	0	1	0	0	0	0	0	0	0	1	0	0	0	0
26	24	75	Stanley	Stanley	LOCAL PERCEPTION OF PUBLIC GOODS: RECENT ASSESSMENTS OF WILLINGNESS-TO-PAY FOR ENDANGERED SPECIES	2005	22	Contemporary Economic Policy	United States	North-America	1	0	0	1	0	1	1	1	37273.6	10.526	24.85		1.233	30.6401	3.42231	1	0	0.242	242	1	1	1	0	0	0	0	0	0	0	1	1	0	0	0	0	0	0	0	0
26	24	76	Stanley	Stanley	LOCAL PERCEPTION OF PUBLIC GOODS: RECENT ASSESSMENTS OF WILLINGNESS-TO-PAY FOR ENDANGERED SPECIES	2005	22	Contemporary Economic Policy	United States	North-America	1	0	0	1	0	1	1	1	37273.6	10.526	28.23		1.233	34.8076	3.54984	1	0	0.242	242	1	1	1	0	0	0	0	0	0	0	1	1	0	0	0	0	0	0	0	1
26	24	77	Stanley	Stanley	LOCAL PERCEPTION OF PUBLIC GOODS: RECENT ASSESSMENTS OF WILLINGNESS-TO-PAY FOR ENDANGERED SPECIES	2005	22	Contemporary Economic Policy	United States	North-America	1	0	0	1	0	1	1	1	37273.6	10.526	52.12		1.233	64.264	4.163	1	0	0.281	281	1	1	1	0	0	0	0	0	0	1	1	0	1	0	0	0	0	0	0	0
26	24	78	Stanley	Stanley	LOCAL PERCEPTION OF PUBLIC GOODS: RECENT ASSESSMENTS OF WILLINGNESS-TO-PAY FOR ENDANGERED SPECIES	2005	22	Contemporary Economic Policy	United States	North-America	1	0	0	1	0	1	1	1	37273.6	10.526	59.06		1.233	72.821	4.288	1	0	0.281	281	1	1	1	0	0	0	0	0	0	1	1	0	1	0	0	0	0	0	0	1
26	24	79	Stanley	Stanley	LOCAL PERCEPTION OF PUBLIC GOODS: RECENT ASSESSMENTS OF WILLINGNESS-TO-PAY FOR ENDANGERED SPECIES	2005	22	Contemporary Economic Policy	United States	North-America	1	0	0	0	0	1	1	1	37273.6	10.526	29.56		1.233	36.4475	3.59587	1	0	0.21	210	1	1	1	0	0	0	0	0	0	1	1	0	1	0	0	0	0	0	0	1
26	24	80	Stanley	Stanley	LOCAL PERCEPTION OF PUBLIC GOODS: RECENT ASSESSMENTS OF WILLINGNESS-TO-PAY FOR ENDANGERED SPECIES	2005	22	Contemporary Economic Policy	United States	North-America	1	0	0	0	0	1	1	1	37273.6	10.526	56.41		1.233	69.5536	4.2421	1	0	0.234	234	1	1	1	0	0	0	0	0	0	1	1	0	1	0	0	0	0	0	0	1
27	25	81	Willis	Willis	Benefits of Environmentally Sensitive Area Policy in England: A Contingent Valuation Assessment	1995	14	Journal of Environmental Management	United Kingdom	Europe	1	0	0	1	0	1	1	0	18499	9.82547	36.65	1.40044	1.50577	77.2852	4.3475	0	0	0.534	534	0	1	1	1	0	0	1	0	0	0	0	0	0	1	1	0	0	0	0	0
28	26	82	Carneiro	Carneiro	Payment vehicle as an instrument to elicit economic demand for conservation	2014	34	Ocean and Coastal management	Brazil	South-America	1	0	0	1	1	0	0	0	15971	9.67853	38.56		1.04216	40.1857	3.69351	0	0	0.445	445	0	1	0	1	1	0	0	0	0	0	0	0	0	1	1	0	0	0	0	0
28	26	83	Carneiro	Carneiro	Payment vehicle as an instrument to elicit economic demand for conservation	2014	34	Ocean and Coastal management	Brazil	South-America	1	0	0	1	1	0	0	0	15971	9.67853	10.91		1.04216	11.37	2.43098	0	0	0.445	445	0	1	0	1	1	0	0	0	0	0	0	0	0	1	1	1	0	0	0	0
29	27	84	Martinez_Paz	Martinez_Paz	A probabilistic approach for the socioeconomic assessment of urban river rehabilitation projects	2014	33	Land Use Policy	Spain	Europe	1	0	0	1	0	0	0	0	31988.3	10.3731	19.42	1.50976	1.04216	30.5556	3.41955	0	1	0.062	62	1	1	1	1	0	1	0	0	0	0	0	0	0	1	1	0	0	1	0	1
30	28	85	Kontogianni	Kontogianni	Service providing units, existence values and the valuation of endangered species: A methodological test	2012	30	Ecological Economics	Greece	Europe	1	0	0	0	1	0	0	0	30359.9	10.3209	56.8	1.46057	1.078	89.4312	4.49347	1	0	0.181	181	0	1	1	0	0	0	0	0	1	0	1	1	0	1	0	0	0	0	1	1
31	29	86	Chang	Chang	Social Benefits of Controlling Forest Insect Outbreaks: A Contingent Valuation Analysis in Two Canadian Provinces	2011	28	Canadian Journal of Agricultural Economics	Canada	North-America	1	0	0	0	0	0	0	1	39442	10.5826	13.4316		1.09785	14.7459	2.69097	0	0	0.229	229	0	1	1	1	0	0	0	1	0	0	0	0	0	0	0	0	0	0	1	0
31	29	87	Chang	Chang	Social Benefits of Controlling Forest Insect Outbreaks: A Contingent Valuation Analysis in Two Canadian Provinces	2011	28	Canadian Journal of Agricultural Economics	Canada	North-America	1	0	0	0	0	0	0	1	39442	10.5826	23.6912		1.09785	26.0095	3.25846	0	0	0.166	166	0	1	1	1	0	0	0	1	0	0	0	0	0	0	0	0	0	0	1	1
31	29	88	Chang	Chang	Social Benefits of Controlling Forest Insect Outbreaks: A Contingent Valuation Analysis in Two Canadian Provinces	2011	28	Canadian Journal of Agricultural Economics	Canada	North-America	1	0	0	0	0	0	0	1	39442	10.5826	24.2966		1.09785	26.6741	3.28369	0	0	0.229	229	0	1	1	1	0	0	0	1	0	0	0	0	0	0	0	0	0	0	1	0
31	29	89	Chang	Chang	Social Benefits of Controlling Forest Insect Outbreaks: A Contingent Valuation Analysis in Two Canadian Provinces	2011	28	Canadian Journal of Agricultural Economics	Canada	North-America	1	0	0	0	0	0	0	1	39442	10.5826	33.9589		1.09785	37.2819	3.61851	0	0	0.166	166	0	1	1	1	0	0	0	1	0	0	0	0	0	0	0	0	0	0	1	1
32	30	90	McFadden	McFadden	Contingent valuation and Social Choice	1994	11	American Journal of Agricultural Economics	United States	North-America	1	0	0	0	1	0	0	1	23954.5	10.0839	38.16		1.53717	58.6584	4.07173	0	0	1.229	1229	0	1	1	1	0	0	0	1	0	0	0	0	0	1	0	0	0	0	0	1
32	30	91	McFadden	McFadden	Contingent valuation and Social Choice	1994	11	American Journal of Agricultural Economics	United States	North-America	1	0	0	1	1	0	0	1	23954.5	10.0839	70.2		1.53717	107.909	4.68129	0	0	1.229	1229	0	1	1	1	0	0	0	1	0	0	0	0	0	1	0	0	0	0	0	1
32	30	92	McFadden	McFadden	Contingent valuation and Social Choice	1994	11	American Journal of Agricultural Economics	United States	North-America	1	0	0	0	1	0	0	1	23954.5	10.0839	70.09		1.53717	107.74	4.67972	0	0	1.229	1229	0	1	1	1	0	0	0	1	0	0	0	0	0	1	0	0	0	0	0	1
32	30	93	McFadden	McFadden	Contingent valuation and Social Choice	1994	11	American Journal of Agricultural Economics	United States	North-America	1	0	0	1	0	0	0	1	23954.5	10.0839	46.6		1.53717	71.6322	4.27154	0	0	1.229	1229	0	1	1	1	0	0	0	1	0	0	0	0	0	1	0	0	0	0	0	1
33	31	94	OGarra	OGarra	Bequest Values for Marine Resources: How Important for Indigenous Communities in Less-Developed Economies?	2009	28	Environmental and Resource Economics	Fiji	Oceania	1	0	0	1	0	1	0	0	6956.3	8.8474	183.9	1.05879	1.13421	220.844	5.39746	0	0	0.408	408	0	1	1	1	1	0	0	0	0	0	0	0	0	1	1	1	0	0	0	1
34	32	95	Martinez_Espineira	Martinez_Espineira	Adopt a Hypothetical Pup: A Count Data Approach to the Valuation of Wildlife	2007	26	Environmental and Resource Economics	Canada	North-America	1	0	0	0	0	1	0	1	36134.6	10.495	57.06		1.16524	66.4885	4.19703	1	0	0.235	235	0	1	0	0	0	0	0	0	1	0	1	1	0	1	0	1	0	0	0	0
35	33	96	Tisdell	Tisdell	Policies for saving a rare Australian glider: economics and ecology	2005	23	Biological Conservation	Australia	Oceania	1	0	0	1	1	0	0	0	28706.4	10.2649	28.89		1.233	35.6214	3.57295	1	0	0.204	204	0	0	0	0	0	0	0	0	1	0	1	1	0	0	0	1	0	0	0	0
36	34	97	Horton	Horton	Evaluating non-user willingness to pay for a large-scale conservation programme in Amazonia: a UK/Italian contingent valuation study	2003	21	Environmental Conservation 3	United Kingdom	Europe	1	0	0	1	0	1	0	0	26245.9	10.1753	12.94	1.43534	1.30767	24.2878	3.18997	0	0	0.103	103	0	1	1	1	0	0	0	1	0	0	0	0	0	1	1	0	0	0	0	0
36	34	98	Horton	Horton	Evaluating non-user willingness to pay for a large-scale conservation programme in Amazonia: a UK/Italian contingent valuation study	2003	21	Environmental Conservation 3	Italy	Europe	1	0	0	1	0	1	0	0	27022.9	10.2044	49.54	1.43534	1.30767	92.9844	4.53243	0	0	0.108	108	0	1	1	1	0	0	0	1	0	0	0	0	0	1	1	0	0	0	0	0
36	34	99	Horton	Horton	Evaluating non-user willingness to pay for a large-scale conservation programme in Amazonia: a UK/Italian contingent valuation study	2003	21	Environmental Conservation 3	United Kingdom	Europe	1	0	0	1	0	1	0	0	26245.9	10.1753	20.65	1.43534	1.30767	38.7591	3.65737	0	0	0.103	103	0	1	1	1	0	0	0	1	0	0	0	0	0	1	1	0	0	0	0	0
36	34	100	Horton	Horton	Evaluating non-user willingness to pay for a large-scale conservation programme in Amazonia: a UK/Italian contingent valuation study	2003	21	Environmental Conservation 3	Italy	Europe	1	0	0	1	0	1	0	0	27022.9	10.2044	40.41	1.43534	1.30767	75.8478	4.32873	0	0	0.108	108	0	1	1	1	0	0	0	1	0	0	0	0	0	1	1	0	0	0	0	0
37	35	101	Walsh_Loomis_Gillman	Walsh_Loomis_Gillman	Valuing option, existence, and bequest demand for wilderness	1984	1	Land Economics	United States	North-America	1	0	0	1	1	0	0	1	15920	9.67533	9.88		2.04488	20.2034	3.00585	0	0	0.195	195	0	1	1	1	0	0	0	1	0	0	0	0	0	0	0	1	0	0	1	1
37	35	102	Walsh_Loomis_Gillman	Walsh_Loomis_Gillman	Valuing option, existence, and bequest demand for wilderness	1984	1	Land Economics	United States	North-America	1	0	0	1	1	0	0	1	15920	9.67533	13.31		2.04488	27.2173	3.30385	0	0	0.195	195	0	1	1	1	0	0	0	1	0	0	0	0	0	0	0	1	0	0	1	1
37	35	103	Walsh_Loomis_Gillman	Walsh_Loomis_Gillman	Valuing option, existence, and bequest demand for wilderness	1984	1	Land Economics	United States	North-America	1	0	0	1	1	0	0	1	15920	9.67533	17.96		2.04488	36.726	3.60349	0	0	0.195	195	0	1	1	1	0	0	0	1	0	0	0	0	0	0	0	1	0	0	1	1
37	35	104	Walsh_Loomis_Gillman	Walsh_Loomis_Gillman	Valuing option, existence, and bequest demand for wilderness	1984	1	Land Economics	United States	North-America	1	0	0	1	1	0	0	1	15920	9.67533	22.6		2.04488	46.2143	3.83329	0	0	0.195	195	0	1	1	1	0	0	0	1	0	0	0	0	0	0	0	1	0	0	1	1
38	36	105	Walsh_Bjonback_	Walsh_Bjonback_	Estimating the public benefits of protecting forest quality	1990	4	Journal of Environmental Economics and Management	United States	North-America	1	0	0	0	0	1	0	1	19216.1	9.8635	24		1.69859	40.7662	3.70785	0	0	0.198	198	0	1	1	1	0	0	0	1	0	0	0	0	0	1	0	0	0	0	1	1
39	37	106	Oglethorpe	Oglethorpe	Economic valuation of the non-use attributes of a wetland : A case-study for Lake Kerkini	2000	18	Journal of Environmental Planning and Management	Greece	Europe	1	0	0	0	0	1	0	0	17146.2	9.74953	15.2136	1.41919	1.38508	29.9054	3.39804	0	0	0.045	45	0	1	0	1	0	1	0	0	0	0	0	0	0	1	1	1	0	0	1	1
39	37	107	Oglethorpe	Oglethorpe	Economic valuation of the non-use attributes of a wetland : A case-study for Lake Kerkini	2000	18	Journal of Environmental Planning and Management	Greece	Europe	1	0	0	0	0	1	0	0	17146.2	9.74953	6.5	1.41919	1.38508	12.777	2.54765	0	0	0.102	102	0	1	0	1	0	1	0	0	0	0	0	0	0	1	1	1	0	0	1	1
40	38	108	Gilbert	Gilbert	Valuation of Eastern Wilderness	1991	11	0	United States	North-America	0	0	0	0	1	0	0	1	23954.5	10.0839	4.69		1.64387	7.70977	2.04249	0	0	0.7	700	0	1	0	1	0	0	0	1	0	0	0	0	0	0	0	1	0	0	1	0
40	38	109	Gilbert	Gilbert	Valuation of Eastern Wilderness	1991	11	0	United States	North-America	0	0	0	0	1	0	0	1	23954.5	10.0839	4.78		1.64387	7.85771	2.0615	0	0	0.7	700	0	1	0	1	0	0	0	1	0	0	0	0	0	0	0	1	0	0	1	0
41	39	110	Sutherland	Sutherland	Effect of Distance on the Preservation Value of Water Quality	1985	2	Land Economics	United States	North-America	1	0	0	1	1	0	0	1	17406.3	9.76459	46.25		1.98148	91.6435	4.51791	0	0	0.171	171	0	0	1	1	0	1	0	0	0	0	0	0	0	0	0	1	0	0	1	0
41	39	111	Sutherland	Sutherland	Effect of Distance on the Preservation Value of Water Quality	1985	2	Land Economics	United States	North-America	1	0	0	0	1	0	0	1	17406.3	9.76459	46.47		1.98148	92.0794	4.52265	0	0	0.171	171	0	0	1	1	0	1	0	0	0	0	0	0	0	0	0	1	0	0	1	0
42	40	112	Loomis	Loomis	Do reminders of substitutes and budget constraints influence contingent valuation estimates?	1994	14	Land Economics	United States	North-America	1	0	0	0	0	0	0	1	26464.9	10.1836	90.09		1.53717	138.484	4.93075	0	0	0.22	220	0	1	1	0	0	0	0	1	0	0	0	0	0	0	0	1	0	0	0	1
43	41	113	Amirnejad	Amirnejad	Estimating the existence value of north forests of Iran by using a contingent valuation method	2006	25	Ecological Economics	Iran	Asia	1	0	0	0	0	0	0	0	13205.6	9.4884	30.12		1.19625	36.031	3.58438	0	0	0.95	950	0	1	1	1	0	0	0	1	0	0	0	0	0	1	1	0	0	0	0	0
44	42	114	Drake	Drake	Public value at risk from Phytophthora ramorum and Phytophthora kernoviae spread in England and Wales	2017	32	Journal of Environmental Management	United Kingdom	Europe	1	0	0	0	0	1	0	0	36608	10.508	1.66	1.40197	1	2.32727	0.844695	0	0	0.204	204	0	1	0	1	0	0	1	0	0	0	0	0	0	0	0	0	1	1	0	1
44	42	115	Drake	Drake	Public value at risk from Phytophthora ramorum and Phytophthora kernoviae spread in England and Wales	2017	32	Journal of Environmental Management	United Kingdom	Europe	1	0	0	0	0	1	0	0	36608	10.508	1.84	1.40197	1	2.57962	0.947643	0	0	0.158	158	0	1	0	1	0	0	0	1	0	0	0	0	0	0	0	0	1	1	0	1
44	42	116	Drake	Drake	Public value at risk from Phytophthora ramorum and Phytophthora kernoviae spread in England and Wales	2017	32	Journal of Environmental Management	United Kingdom	Europe	1	0	0	0	0	1	0	0	36608	10.508	2.34	1.40197	1	3.28061	1.18803	0	0	0.204	204	0	1	0	1	0	0	1	0	0	0	0	0	0	0	0	0	1	1	0	1
44	42	117	Drake	Drake	Public value at risk from Phytophthora ramorum and Phytophthora kernoviae spread in England and Wales	2017	32	Journal of Environmental Management	United Kingdom	Europe	1	0	0	0	0	1	0	0	36608	10.508	2.85	1.40197	1	3.99561	1.3852	0	0	0.158	158	0	1	0	1	0	0	0	1	0	0	0	0	0	0	0	0	1	1	0	1
45	43	118	Armstrong	Armstrong	USE AND NON-USE VALUES IN AN APPLIED BIOECONOMIC MODEL OF FISHERIES AND HABITAT CONNECTIONS	2015	34	Marine Resource Economics	Norway	Europe	1	1	1	0	0	0	0	0	67056.1	11.1133	209.217	0.102739	1.03098	22.1608	3.09832	0	0	4.683	212.422	1	1	1	1	1	0	0	0	0	0	0	0	0	1	1	0	0	0	0	0
46	43	119	Aanesen	Armstrong	Willingness to pay for unfamiliar public goods: 1 Preserving cold-water coral in Norway.	2015	34	Ecological Economics	Norway	Europe	1	1	0	0	0	0	0	0	67056.1	11.1133	1895.28	0.102739	1.03098	200.753	5.30207	0	0	4.683	212.422	1	1	1	1	1	0	0	0	0	0	0	0	0	1	1	0	0	0	0	0
46	43	120	Aanesen	Armstrong	Willingness to pay for unfamiliar public goods: 1 Preserving cold-water coral in Norway.	2015	34	Ecological Economics	Norway	Europe	1	1	1	0	0	0	0	0	67056.1	11.1133	2264.47	0.102739	1.03098	239.858	5.48005	0	0	4.683	212.422	1	1	1	1	1	0	0	0	0	0	0	0	0	1	1	0	0	0	0	0
47	44	121	Wallmo	Wallmo	Using choice models to inform large marine protected area design	2017	36	Marine policy	United States	North-America	1	1	1	0	0	0	0	1	56443.8	10.941	67.2549		1	67.2549	4.20849	0	0	3.354	683.634	1	1	1	1	1	0	0	0	0	0	0	0	0	0	0	0	0	0	0	0
48	45	122	Borger	Borger_2014	Motivationsmatter: Behavioural determinants of preferences for remote and unfamiliar environmental goods	2017	34	Ecological Economics	United Kingdom	Europe	1	1	1	0	0	0	0	0	39308.1	10.5792	51.4146	1.40197	1	72.0817	4.2778	0	1	5.838	524.586	1	1	1	1	1	0	0	0	0	0	0	0	0	0	0	0	0	0	0	1
48	45	123	Borger	Borger_2014	Motivationsmatter: Behavioural determinants of preferences for remote and unfamiliar environmental goods	2017	34	Ecological Economics	United Kingdom	Europe	1	1	1	0	0	0	0	0	39308.1	10.5792	40	1.40197	1	56.0787	4.02676	0	1	5.838	524.586	1	1	1	1	1	0	0	0	0	0	0	0	0	0	0	0	0	0	0	1
48	45	124	Borger	Borger_2014	Motivationsmatter: Behavioural determinants of preferences for remote and unfamiliar environmental goods	2017	34	Ecological Economics	United Kingdom	Europe	1	1	1	0	0	0	0	0	39308.1	10.5792	77.9122	1.40197	1	109.23	4.69346	0	1	5.838	524.586	1	1	1	1	1	0	0	0	0	0	0	0	0	0	0	0	0	0	0	1
48	45	125	Borger	Borger_2014	Valuing conservation benefits of an offshore marine protected area and unfamiliar environmental goods	2014	34	Ecological Economics	United Kingdom	Europe	1	1	0	0	0	0	0	0	39308.1	10.5792	28.3	1.43175	1.04216	42.2269	3.74306	0	1	17.514	524.586	1	1	1	1	1	0	0	0	0	0	0	0	0	0	0	0	0	0	0	1
48	45	126	Borger	Borger_2014	Valuing conservation benefits of an offshore marine protected area and unfamiliar environmental goods	2014	34	Ecological Economics	United Kingdom	Europe	1	1	1	0	0	0	0	0	39308.1	10.5792	56.9683	1.43175	1.04216	85.0034	4.44269	0	1	17.514	524.586	1	1	1	1	1	0	0	0	0	0	0	0	0	0	0	0	0	0	0	1
49	46	127	Kreye	Kreye	Does policy process influence public values for forest-water resource protection in Florida?	2016	32	Ecological Economics	United States	North-America	1	1	1	0	0	0	0	1	49793.7	10.8156	3.88166		1.01799	3.9515	1.3741	0	0	4.14	300.303	0	1	1	1	0	0	0	1	0	0	0	0	0	0	0	0	0	0	0	0
50	47	128	Rudd	Rudd	Non-use Economic Values for Little-Known Aquatic Species at Risk: Comparing Choice Experiment Results from Surveys Focused on Species, Guilds, and Ecosystems	2016	32	Environmental Management	Canada	North-America	1	1	0	0	0	0	0	1	41565.3	10.635	79.98	0.798505	1.01799	65.0135	4.1746	1	0	2.912	140.716	1	1	1	0	0	0	0	0	0	0	1	0	1	0	0	0	0	0	0	1
51	48	129	Morrison	Morrison	Improved wetland quality using choice modeling	1999	18	Water Resources Research	Australia	Oceania	1	1	0	0	0	0	0	0	22924.1	10.0399	102.62	0.77104	1.4166	112.087	4.71928	0	1	1.183	171.448	1	0	1	1	0	1	0	0	0	0	0	0	0	0	0	0	0	1	0	0
52	49	130	Farber, Griner	Farber, Griner	Valuing watershed quality improvements using conjoint analysis	2000	17	Ecological Economics	United States	North-America	1	1	0	0	0	0	0	1	30068.2	10.3112	48.15		1.38508	66.6917	4.20008	0	0	0.362	37.74	1	1	1	1	0	1	0	0	0	0	0	0	0	0	0	0	0	1	0	0
52	49	131	Farber, Griner	Farber, Griner	Valuing watershed quality improvements using conjoint analysis	2000	17	Ecological Economics	United States	North-America	1	1	0	0	0	0	0	1	30068.2	10.3112	41.92		1.38508	58.0626	4.06152	0	0	0.362	37.74	1	1	1	1	0	1	0	0	0	0	0	0	0	0	0	0	0	1	0	0
53	50	132	Morse-Jones	Morse-Jonges	Stated preferences for tropical wildlife conservation amongst distant beneficiaries: Charisma, endemism, scope and substitution effects	2012	30	Ecological Economics	United Kingdom	Europe	1	1	1	0	0	0	0	0	34589.6	10.4513	42.02	1.42524	1.078	64.5599	4.16759	1	0	1.998	538.604	0	1	1	0	0	0	0	0	1	1	1	0	1	0	0	1	0	0	0	1
54	51	133	Norton and Hynes	Norton and Hynes	Valuing the non-market benefits arising fromtheimplementation of theEUMarineStrategyFrameworkDirective	2014	33	Ecosystem Services	Ireland	Europe	1	1	1	0	0	0	0	0	46374.2	10.7445	144.963	1.22094	1.04216	184.453	5.2174	0	0	4.944	437.784	0	1	0	1	1	0	0	0	0	0	0	0	0	1	0	0	0	0	0	1
56	53	134	Jobstvogt et al.	Jobstvogt	Twenty thousand sterling under the sea: Estimating the value of protecting deep-sea biodiversity	2014	31	Ecological Economics	Scotland	Europe	1	1	0	0	0	0	0	0	35875.5	10.4878	81.2283	1.43175	1.04216	121.202	4.79746	0	1	7.146	214.04	1	1	1	1	1	0	0	0	0	0	0	0	0	0	0	0	0	0	0	1
56	53	135	Jobstvogt et al.	Jobstvogt	Twenty thousand sterling under the sea: Estimating the value of protecting deep-sea biodiversity	2014	31	Ecological Economics	Scotland	Europe	1	1	1	0	0	0	0	0	35875.5	10.4878	76.9211	1.43175	1.04216	114.775	4.74298	0	1	7.146	214.04	1	1	1	1	1	0	0	0	0	0	0	0	0	0	0	0	0	0	0	1
57	54	136	Schaafsma	Schaafsma	Directional heterogeneity in WTP models for environmental valuation	2012	30	Ecological Economics	Netherlands	Europe	1	1	1	0	0	0	0	0	44037.4	10.6928	127.9	1.21299	1.078	167.242	5.11944	0	1	3.184	479.298	1	1	1	1	0	1	0	0	0	0	0	0	0	0	0	0	0	1	0	1
57	54	137	Schaafsma	Schaafsma	Directional heterogeneity in WTP models for environmental valuation	2012	30	Ecological Economics	Netherlands	Europe	1	1	1	0	0	0	0	0	44037.4	10.6928	159.075	1.21299	1.078	208.007	5.33757	0	1	3.184	479.298	1	1	1	1	0	1	0	0	0	0	0	0	0	0	0	0	0	1	0	1
57	54	138	Schaafsma	Schaafsma	Directional heterogeneity in WTP models for environmental valuation	2012	30	Ecological Economics	Netherlands	Europe	1	1	1	0	0	0	0	0	44037.4	10.6928	153.8	1.21299	1.078	201.109	5.30385	0	1	3.184	479.298	1	1	1	1	0	1	0	0	0	0	0	0	0	0	0	0	0	1	0	1
57	54	139	Schaafsma	Schaafsma	Directional heterogeneity in WTP models for environmental valuation	2012	30	Ecological Economics	Netherlands	Europe	1	1	1	0	0	0	0	0	44037.4	10.6928	137.225	1.21299	1.078	179.436	5.18982	0	1	3.184	479.298	1	1	1	1	0	1	0	0	0	0	0	0	0	0	0	0	0	1	0	1
57	54	140	Schaafsma	Schaafsma	Directional heterogeneity in WTP models for environmental valuation	2012	30	Ecological Economics	Netherlands	Europe	1	1	1	0	0	0	0	0	44037.4	10.6928	160.325	1.21299	1.078	209.641	5.3454	0	1	3.184	479.298	1	1	1	1	0	1	0	0	0	0	0	0	0	0	0	0	0	1	0	1
57	54	141	Schaafsma	Schaafsma	Directional heterogeneity in WTP models for environmental valuation	2012	30	Ecological Economics	Netherlands	Europe	1	1	1	0	0	0	0	0	44037.4	10.6928	139.85	1.21299	1.078	182.868	5.20877	0	1	3.184	479.298	1	1	1	1	0	1	0	0	0	0	0	0	0	0	0	0	0	1	0	1
58	55	142	McVittie	McVittie	Valuing the non-use benefits of marine conservation zones: An application to the UK Marine Bill	2010	29	Ecological Economics	United Kingdom	Europe	1	1	1	0	0	0	0	0	36257.5	10.4984	70.5333	1.42528	1.12052	112.646	4.72425	0	0	1.27	684.712	1	1	1	1	1	0	0	0	0	0	0	0	0	1	1	0	0	0	0	0
58	55	143	McVittie	McVittie	Valuing the non-use benefits of marine conservation zones: An application to the UK Marine Bill	2010	29	Ecological Economics	United Kingdom	Europe	1	1	1	0	0	0	0	0	36257.5	10.4984	24.0392	1.42528	1.12052	38.3921	3.64785	0	0	0.799	430.775	1	1	1	1	1	0	0	0	0	0	0	0	0	1	1	0	0	0	0	0
58	55	144	McVittie	McVittie	Valuing the non-use benefits of marine conservation zones: An application to the UK Marine Bill	2010	29	Ecological Economics	United Kingdom	Europe	1	1	1	0	0	0	0	0	36257.5	10.4984	57.6923	1.42528	1.12052	92.1381	4.52329	0	0	0.837	451.263	1	1	1	1	1	0	0	0	0	0	0	0	0	1	1	0	0	0	0	0
58	55	145	McVittie	McVittie	Valuing the non-use benefits of marine conservation zones: An application to the UK Marine Bill	2010	29	Ecological Economics	United Kingdom	Europe	1	1	1	0	0	0	0	0	36257.5	10.4984	37.9833	1.42528	1.12052	60.6617	4.10531	0	0	0.822	443.176	1	1	1	1	1	0	0	0	0	0	0	0	0	1	1	0	0	0	0	0
59	56	146	Windle and Rolfe	Windle and Rolfe	Assessing Non-use Values for Environmental Protection of an Estuary in a Great Barrier Reef Catchment	2005	24	Australian Journal of Environmental Management	Australia	Oceania	1	1	0	0	0	0	0	0	29678.5	10.2982	377.122	0.720276	1.233	334.922	5.8139	0	0	1.208	81.4106	1	1	1	1	0	1	0	0	0	0	0	0	0	0	0	0	0	0	0	0
60	57	147	Logar	Logar	Do the societal benefits of river restoration outweigh their costs? A costbenefit analysis	2019	36	Journal of Environmental Management	Switzerland	Europe	1	1	1	0	0	0	0	0	63648.3	11.0611	30.4091	0.819534	1	24.9213	3.21572	0	0	1.398	134.786	1	1	1	1	0	1	0	0	0	0	0	0	0	1	1	0	0	0	0	1
60	57	148	Logar	Logar	Do the societal benefits of river restoration outweigh their costs? A costbenefit analysis	2019	36	Journal of Environmental Management	Switzerland	Europe	1	1	1	0	0	0	0	0	63648.3	11.0611	30.1059	0.819534	1	24.6728	3.2057	0	0	1.41	134.786	1	1	1	1	0	1	0	0	0	0	0	0	0	1	1	0	0	0	0	1
61	58	149	Jacobsen	Jacobsen	Valuation of wildlife populations above survival	2012	36	Biodiversity Conservation	Denmark	Europe	1	1	1	0	0	0	0	0	48674.8	10.7929	9.12	0.132203	1.078	1.29973	0.262157	1	0	4.348	208.648	1	1	1	0	0	0	0	0	1	1	1	0	1	0	0	0	0	0	0	1
62	59	150	Hoyos	Hoyos	Valuing a Natura 2000 network site to inform land use options using a discrete choice experiment: An illustration from the Basque Country	2012	31	Journal of Forest Economics	Spain	Europe	1	1	1	0	0	0	0	0	31954.2	10.3721	40.2855	1.4389	1.078	62.4881	4.13498	0	1	1.326	119.151	0	1	0	1	0	0	0	1	0	0	0	0	0	1	0	1	0	0	0	1
62	59	151	Hoyos	Hoyos	Valuing a Natura 2000 network site to inform land use options using a discrete choice experiment: An illustration from the Basque Country	2012	31	Journal of Forest Economics	Spain	Europe	1	1	0	0	0	0	0	0	31954.2	10.3721	7.43935	1.4389	1.078	11.5394	2.44577	0	1	1.326	119.151	0	1	0	1	0	0	0	1	0	0	0	0	0	1	0	1	0	0	0	1
[truncated: 6 more columns]
